# Supplementary material
Source: PubMed Central journal article supplement (PMC3459818)
Supplement: NIHMS49738-supplement-1.pdf [file NIHMS49738-supplement-1.pdf]

## **SUPPLEMENTARY NOTE**

**Common variants at the MHC locus and at chromosome 16q24.1 predispose to Barrett's esophagus.**

The Esophageal Adenocarcinoma Genetics Consortium and the Wellcome Trust Case Control Consortium 2

A full list of authors and affiliations appears at the end of the Supplementary Note

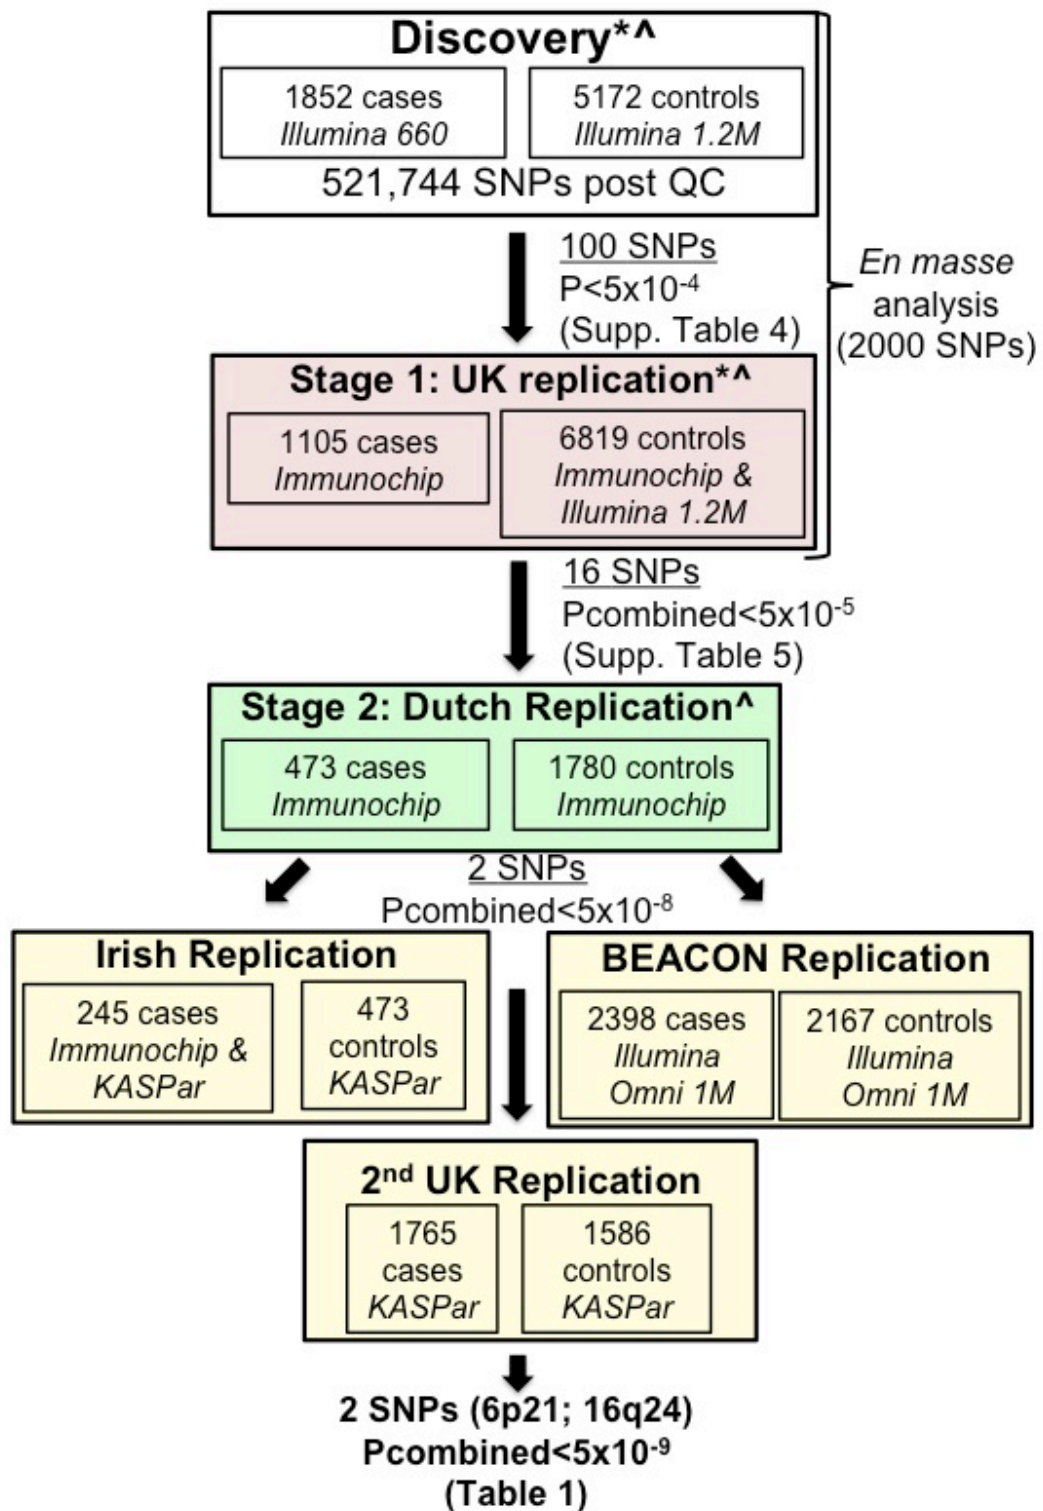

**Supplementary Figure 1** Outline of the analysis workflow. \*HLA alleles imputed, <sup>^</sup>C&M; Sex stratified analysis; Subset of sample (5%) also genotyped with KASPar at top 2 SNPs. Replication stages are coloured, pink- stage 1, green- stage 2, yellow-stage 3.

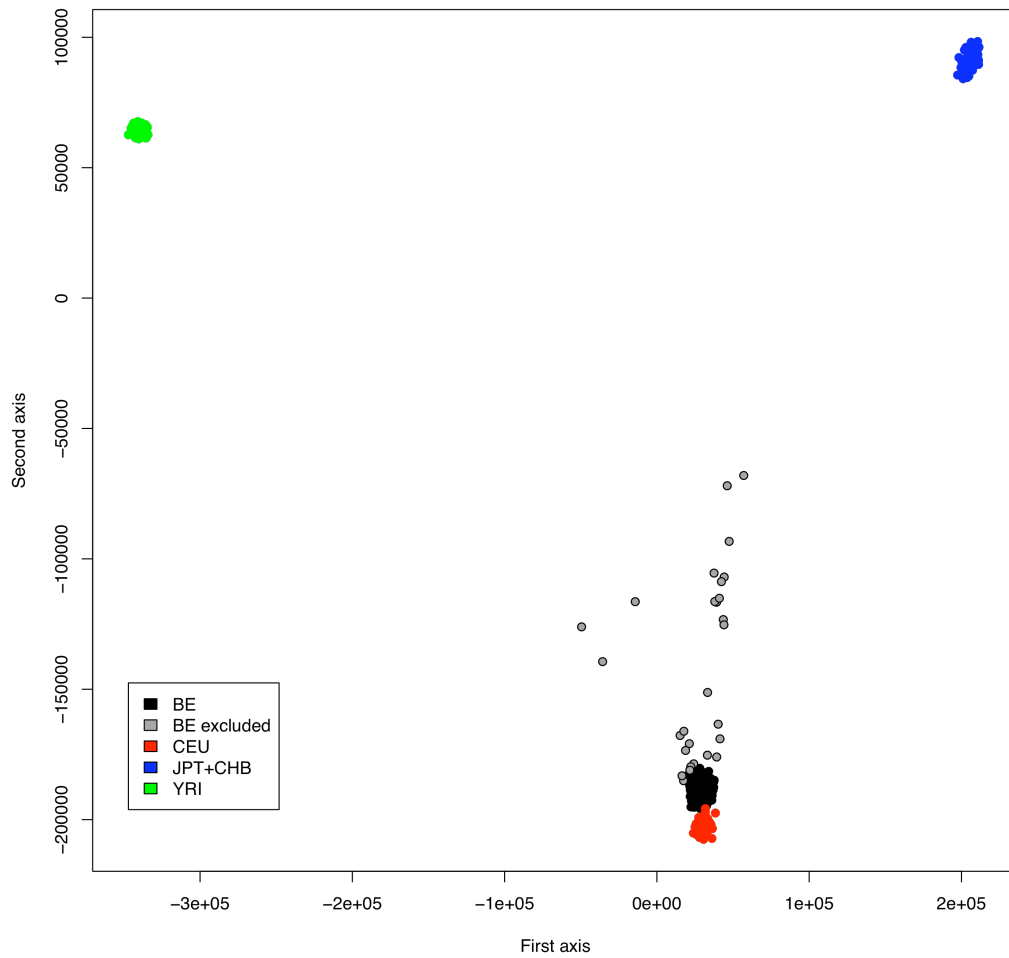

**Supplementary Figure 2.** Plot of the first two principal components computed from the Hapmap samples (CEU: red, YRI: green, JPT&CHB: blue) and then projected on to the cases (black) to show ancestry outliers. The case individuals that were excluded based on this analysis are shown in grey.

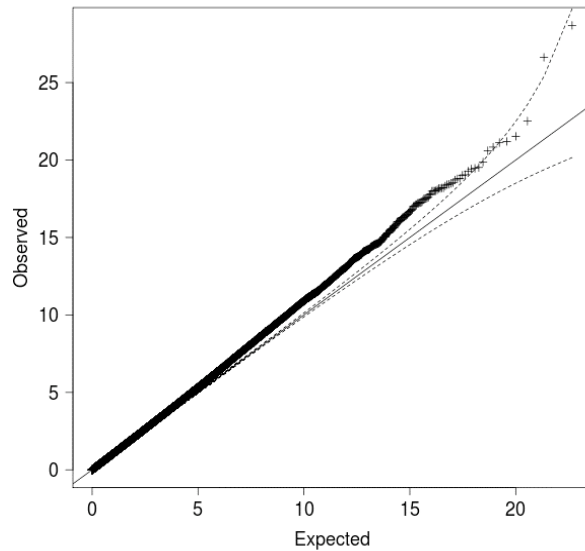

**Supplementary Figure 3.** Quantile-Quantile Plot showing the observed and the expected chi squared statistics of the discovery analysis, with 1 PCA as a covariate.  $\lambda=1.05$ , and when standardized to a population of 1000 cases and 1000 controls,  $\lambda_{1000}=1.019$ .

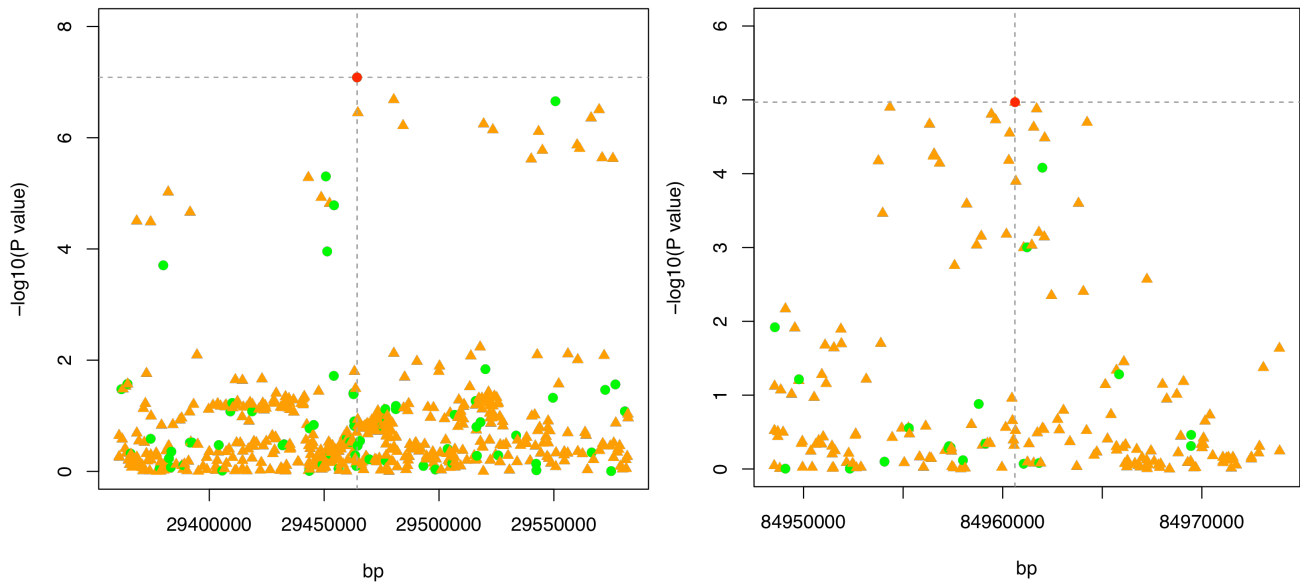

**Supplementary Figure 4.** Regional association plots showing imputation results at the two hit regions, chromosome 6p21 on the left and 16q34 on the right. Green circles represent the genotyped SNPs and orange triangles represent imputed SNPs. The top SNPs found in the discovery genotype data are shown as red circles.

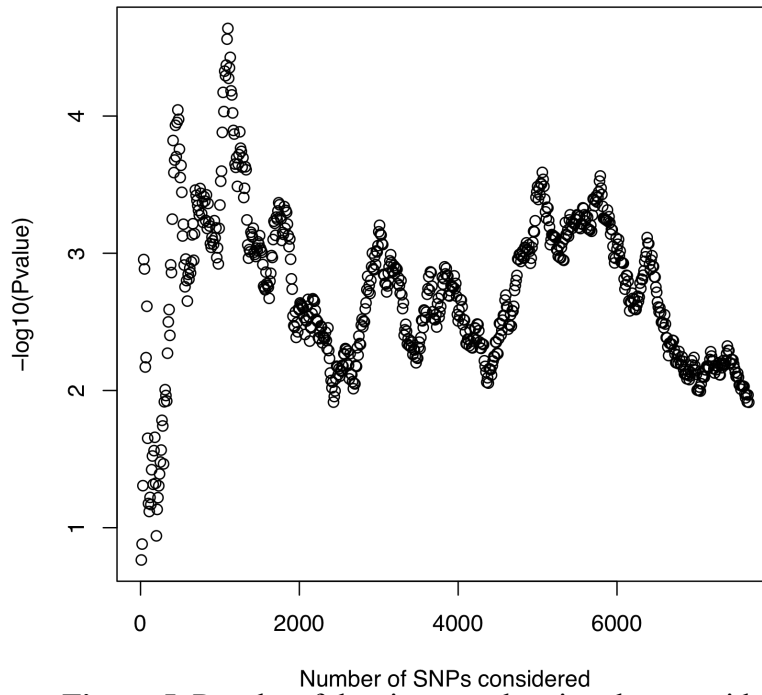

**Supplementary Figure 5.** Results of the sign test showing the two-sided P values for the number of pruned SNPs that have the same direction of effects in the discovery and replication samples.

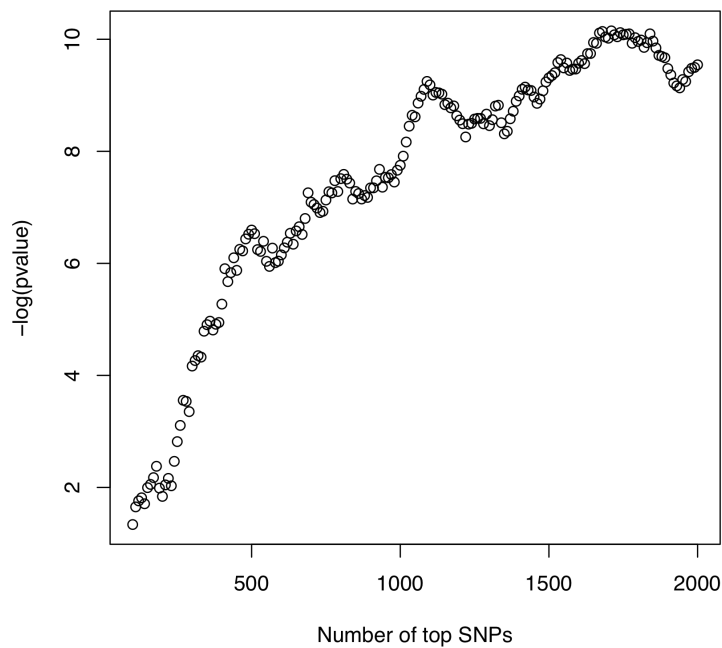

**Supplementary Figure 6.** Results of the score analysis where a score is calculated for each replication individual, based on the number of risk alleles carried by each individual weighted by the log of the odds ratio from the discovery data. The P value is testing for evidence of higher scores in the cases sample compared to the controls sample.

**Supplementary Table 1** Characteristics of discovery and replication case (CA) and control (CO) populations after exclusions

|                                               | Discovery          |                    | Stage 1            |                    | Stage 2              |                       | Stage 3              |                      |                    |                    |                        |                        |
|-----------------------------------------------|--------------------|--------------------|--------------------|--------------------|----------------------|-----------------------|----------------------|----------------------|--------------------|--------------------|------------------------|------------------------|
|                                               | UK<br>CA<br>n=1852 | UK<br>CO<br>n=5172 | UK<br>CA<br>n=1105 | UK<br>CO<br>n=6819 | Dutch<br>CA<br>n=473 | Dutch<br>CO<br>n=1780 | Irish<br>CA<br>n=245 | Irish<br>CO<br>n=473 | UK<br>CA<br>n=1765 | UK<br>CO<br>n=1586 | BEACON<br>CA<br>n=2398 | BEACON<br>CO<br>n=2167 |
| <b>Sex</b>                                    |                    |                    |                    |                    |                      |                       |                      |                      |                    |                    |                        |                        |
| Males                                         | 1488               | 2609               | 783                | 3270               | 350                  | 1054                  | 157                  | 166                  | 1260               | 717                | 1822                   | 1703                   |
| Females                                       | 364                | 2563               | 319                | 3512               | 123                  | 726                   | 57                   | 304                  | 494                | 889                | 576                    | 464                    |
| Not stated                                    | 0                  | 0                  | 3                  | 0                  |                      | 0                     | 21                   | 3                    | 11                 | 68                 |                        |                        |
| <b>Age</b>                                    |                    |                    |                    |                    |                      |                       |                      |                      |                    |                    |                        |                        |
| <=40                                          | 85                 | 1237               | 25                 |                    | 12                   |                       |                      | 301                  | 30                 | 236                | 122                    | 97                     |
| 41-50                                         | 320                | 702                | 66                 |                    | 21                   |                       |                      | 89                   | 167                | 168                | 320                    | 242                    |
| 51-60                                         | 601                | 3178               | 154                |                    | 77                   |                       |                      | 65                   | 362                | 291                | 637                    | 573                    |
| 61-70                                         | 646                | 46                 | 324                |                    | 57                   |                       |                      | 15                   | 716                | 294                | 671                    | 755                    |
| 70+                                           | 199                | 0                  | 316                |                    | 57                   |                       |                      | 0                    | 481                | 134                | 648                    | 500                    |
| Not reported                                  | 1                  | 9                  | 220                | 6819               | 249                  | 1780                  | 245                  | 3                    | 9                  | 463                | 0                      | 0                      |
| <b>Reported Ethnicity</b>                     |                    |                    |                    |                    |                      |                       |                      |                      |                    |                    |                        |                        |
| White Caucasian                               | 1836               | 5172               | 1094               | 6819               | 472                  | 1780                  | 245                  | 473                  | 1765               | 1568               | 2349                   | 2161                   |
| Other                                         | 0                  | 0                  | 0                  | 0                  | 0                    | 0                     | 0                    | 0                    | 0                  | 0                  | 7                      | 6                      |
| Not reported                                  | 16                 | 0                  | 11                 | 0                  | 1                    | 0                     | 0                    | 0                    | 0                  | 0                  | 42                     | 0                      |
| <b>CASE ONLY Prague Criteria Measurements</b> |                    |                    |                    |                    |                      |                       |                      |                      |                    |                    |                        |                        |
| <b>Circumferential (C) length/cm</b>          |                    |                    |                    |                    |                      |                       |                      |                      |                    |                    |                        |                        |
| Mean                                          | 4.05               |                    | 3.59               |                    | NA                   |                       | NA                   |                      | 3.13               |                    |                        |                        |
| 95% CI                                        | 3.91-4.18          |                    | 3.38-3.80          |                    |                      |                       |                      |                      | 2.96-3.30          |                    |                        |                        |
| Range                                         | 0-22               |                    | 0-23               |                    |                      |                       |                      |                      | 0-17               |                    |                        |                        |
| <b>Maximal (M) length/cm</b>                  |                    |                    |                    |                    |                      |                       |                      |                      |                    |                    |                        |                        |
| Mean                                          | 4.60               |                    | 4.65               |                    | 4.37                 |                       | 5.12                 |                      | 4.58               |                    |                        |                        |
| 95% CI                                        | 4.47-4.74          |                    | 4.47-4.84          |                    | 4.01-4.73            |                       | 4.51-5.72            |                      | 4.43-4.73          |                    |                        |                        |
| Range                                         | 1-24               |                    | 1-23               |                    | 1-15                 |                       | 1-17                 |                      | 1-17               |                    |                        |                        |
| <b>CASE ONLY Intestinal Metaplasia</b>        |                    |                    |                    |                    |                      |                       |                      |                      |                    |                    |                        |                        |
| Positive (%)                                  | 90                 | NA                 | 66                 | NA                 | 80                   | NA                    | 100                  | NA                   | 83                 |                    | 100                    |                        |

**Supplementary Table 2** Discovery sample collection cohorts.

| Site                                               | Number of cases<br>(post QC) |
|----------------------------------------------------|------------------------------|
| Aberdeen Royal Infirmary, Aberdeen                 | 5 (5)                        |
| Addenbrookes Hospital, Cambridge                   | 3 (3)                        |
| Alexandra Hospital, Redditch                       | 21 (21)                      |
| Altnagelvin Hospital, Londonderry                  | 24 (24)                      |
| Antrim & Whiteabbey United Hospitals, Antrim       | 59 (59)                      |
| Ayr Hospital, Ayr                                  | 8 (6)                        |
| Barnsley Hospital NHS Foundation Trust, Barnsley   | 23 (23)                      |
| Barts and The London, London                       | 23 (20)                      |
| Belfast City Hospital, Belfast                     | 13 (13)                      |
| Blackpool Victoria Hospital, Blackpool             | 26 (25)                      |
| Bronglais General Hospital, Aberystwyth            | 19 (17)                      |
| City Hospital Birmingham, Birmingham               | 13 (11)                      |
| Conquest Hospital, St Leonard on Sea               | 7 (7)                        |
| Countess of Chester Hospital, Chester              | 44 (42)                      |
| Craigavon Area Hospital, Craigavon                 | 43 (40)                      |
| Cumberland Infirmary, Carlisle                     | 26 (24)                      |
| Darent Valley Hospital, Dartford                   | 15 (15)                      |
| Derriford Hospital, Plymouth                       | 9 (9)                        |
| Gartnavel General Hospital, Glasgow                | 7 (6)                        |
| George Eliot Hospital, Nuneaton                    | 8 (8)                        |
| Glasgow Royal Infirmary, Glasgow                   | 14 (13)                      |
| Gloucestershire Royal Hospital, Gloucester         | 166 (148)                    |
| Good Hope Hospital, Sutton Coldfield               | 8 (8)                        |
| Guy's Hospital, London                             | 12 (10)                      |
| Hairmyres Hospital, East Kilbride                  | 12 (12)                      |
| Harrogate District Hospital, Harrogate             | 24 (24)                      |
| Hereford County Hospital, Hereford                 | 3 (3)                        |
| John Radcliffe Hospital, Oxford                    | 19 (17)                      |
| Kettering General Hospital, Kettering              | 18 (18)                      |
| Lagan Valley Hospital, Lisburn                     | 19 (17)                      |
| Leicester General Hospital, Leicester              | 111 (96)                     |
| Leicester Royal Infirmary, Leicester               | 137 (131)                    |
| Lister Hospital, Stevenage                         | 16 (14)                      |
| Maidstone Hospital Kent Oncology Centre, Maidstone | 8 (7)                        |
| Mater Infirmorium Hospital, Belfast                | 29 (28)                      |
| May Day University Hospital, Croydon               | 18 (15)                      |
| Neath Port Talbot Hospital, Port Talbot            | 4 (4)                        |

|                                                               |         |
|---------------------------------------------------------------|---------|
| New Cross Hospital, Wolverhampton                             | 7 (7)   |
| Ninewells Hospital, Dundee                                    | 41 (40) |
| Nobles Hospital, Braddan                                      | 6 (5)   |
| North Manchester General Hospital, Manchester                 | 18 (17) |
| North Tyneside General Hospital, North Shields                | 30 (27) |
| Northampton General Hospital, Northampton                     | 5 (5)   |
| QEII East & North Hertfordshire NHS Trust, Welwyn Garden City | 46 (44) |
| Queen Alexandra Hospital, Portsmouth                          | 96 (92) |
| Queen Elizabeth Hospital, Birmingham                          | 4 (4)   |
| Queen Elizabeth Hospital, Kings Lynn                          | 11 (11) |
| Queen Margaret Hospital, Dunfermline                          | 19 (19) |
| Queen Mary's Hospital NHS Trust, Sidcup                       | 10 (8)  |
| Queens Medical Centre, Nottingham                             | 52 (48) |
| Rotherham General Hospital, Rotherham                         | 5 (5)   |
| Royal Albert Edward Infirmary NHS Trust, Wigan                | 53 (48) |
| Royal Alexandra Hospital, Paisley                             | 21 (20) |
| Royal Bournemouth Hospital, Bournemouth                       | 6 (6)   |
| Royal Cornwall Hospital, Truro                                | 8 (8)   |
| Royal Derby Hospital, Derby                                   | 35 (31) |
| Royal Devon & Exeter NHS Foundation Trust, Exeter             | 2 (2)   |
| Royal Infirmary of Edinburgh, Edinburgh                       | 19 (17) |
| Royal Lancaster Infirmary, Lancaster                          | 11 (9)  |
| Royal Liverpool Hospital, Liverpool                           | 28 (24) |
| Royal Oldham Hospital, Oldham                                 | 9 (8)   |
| Royal Sussex County Hospital, Brighton                        | 18 (16) |
| Royal Victoria Hospital, Belfast                              | 56 (56) |
| Russell's Hall Hospital, Dudley                               | 19 (18) |
| Sandwell General Hospital, Lyndon                             | 24 (18) |
| Southern General, Glasgow                                     | 3 (2)   |
| St Mark's Hospital, Harrow                                    | 13 (13) |
| St Mary's Hospital, London                                    | 1 (1)   |
| St Richard's Hospital, Chichester                             | 9 (8)   |
| Stepping Hill Hospital, Stockport                             | 16 (13) |
| Tameside General Hospital, Ashton-under-Lyne                  | 1 (1)   |
| Taunton & Somerset NHS Trust (Musgrove Park), Taunton         | 24 (21) |
| Torbay Hospital, Torquay                                      | 55 (49) |
| Ulster Community Hospitals Trust, Belfast                     | 14 (14) |
| University Hospitals Coventry and Warwickshire, Coventry      | 11 (10) |
| Victoria Hospital, Kirkcaldy                                  | 23 (21) |
| Victoria Infirmary, Glasgow                                   | 2 (2)   |



|                                             |         |
|---------------------------------------------|---------|
| Wansbeck General Hospital, Ashington        | 32 (29) |
| Warwick Hospital, Warwick                   | 12 (9)  |
| Western General Hospital, Edinburgh         | 74 (70) |
| Weston General Hospital , Weston-Super-Mare | 2 (2)   |
| Wexham Park Hospital, Slough                | 8 (8)   |
| Worcestershire Royal Hospital, Worcester    | 4 (4)   |
| Wycombe Hospital, High Wycombe              | 4 (4)   |
| Yeovil Hospital, Yeovil                     | 10 (10) |
| York District Hospital, York                | 7 (5)   |

**Supplementary Table 3** Sample exclusions in the discovery data

|       | PreQC | Int | Sex | Het/<br>CR | Ancestry | Identity | Related | Phenotype | Unique<br>Exc | PostQC |
|-------|-------|-----|-----|------------|----------|----------|---------|-----------|---------------|--------|
| cases | 1991  | 1   | 10  | 67         | 28       | 14       | 24      | 2         | 138           | 1852   |
| 58C   | 2930  | 32  | 11  | 163        | 57       | 1        | 20      | 0         | 256           | 2673   |
| UKBS  | 2737  | 23  | 14  | 111        | 51       | 8        | 54      | 0         | 236           | 2499   |

Numbers of individuals excluded where column headings are: PreQC: the number of samples for which genotypes were available, Int: signal intensity from the chip outlying, Sex: sex modeled from X chromosome intensity mismatched with supplied sex, Het/CR: call rate and heterozygosity, Ancestry: HapMap PCA population exclusions Identity: <90% concordant with initial Sequenom genotypes, Relatedness: >5%IBD, Phenotype: Incorrect assignment of phenotype. Unique Exc: the number of unique sample excluded, PostQC: the number of samples carried through to the analysis stage.

**Supplementary Table 4** The top 100 ranked SNPs at which replication was attempted in the Stage 1 replication.

| Chr | rsID       | Position  | Risk Allele | Cases RAF | Controls RAF | Discovery P value | Discovery OR | 95% CI      | Stage 1 UK Replication P value | Stage 1 UK Replication OR | 95%CI        | Meta P value |
|-----|------------|-----------|-------------|-----------|--------------|-------------------|--------------|-------------|--------------------------------|---------------------------|--------------|--------------|
| 1   | rs7522642  | 44335891  | C           | 0.36      | 0.33         | 1.55E-04          | 1.17         | (1.08-1.27) | 0.176                          | 0.937                     | (0.852-1.03) | 4.62E-02     |
| 1   | rs1503832  | 114291212 | C           | 0.27      | 0.24         | 1.83E-04          | 1.19         | (1.08-1.30) | 0.242                          | 0.94                      | (0.847-1.04) | 3.77E-02     |
| 1   | rs4448517  | 114681615 | G           | 0.22      | 0.19         | 6.64E-05          | 1.22         | (1.10-1.34) | 0.185                          | 1.08                      | (0.964-1.21) | 9.71E-05     |
| 1   | rs7513382  | 158638733 | G           | 0.5       | 0.46         | 1.29E-04          | 1.16         | (1.08-1.25) | 0.103                          | 1.08                      | (0.985-1.18) | 7.10E-05     |
| 1   | rs7511950  | 185322184 | G           | 0.23      | 0.2          | 1.01E-04          | 1.2          | (1.10-1.32) | 0.725                          | 0.98                      | (0.876-1.10) | 5.65E-03     |
| 2   | rs3072     | 20741887  | C           | 0.41      | 0.36         | 2.64E-07          | 1.23         | (1.14-1.33) | 0.222                          | 1.06                      | (0.966-1.16) | 2.43E-06     |
| 2   | rs1377238  | 50252406  | A           | 0.88      | 0.85         | 1.02E-04          | 1.24         | (1.11-1.38) | 0.311                          | 0.936                     | (0.825-1.06) | 2.17E-02     |
| 2   | rs11126740 | 79754603  | A           | 0.39      | 0.35         | 1.10E-05          | 1.19         | (1.10-1.29) | 0.220                          | 0.943                     | (0.859-1.04) | 1.00E-02     |
| 2   | rs1365943  | 137282639 | G           | 0.61      | 0.57         | 1.72E-04          | 1.16         | (1.07-1.25) | 0.225                          | 1.06                      | (0.966-1.16) | 2.62E-04     |
| 2   | rs7583748  | 142571761 | G           | 0.11      | 0.089        | 9.42E-05          | 1.3          | (1.14-1.48) | 0.359                          | 1.08                      | (0.921-1.26) | 3.46E-04     |
| 2   | rs6756958  | 157845179 | C           | 0.99      | 0.98         | 1.38E-04          | 1.75         | (1.31-2.34) | 0.604                          | 1.09                      | (0.781-1.53) | 1.23E-03     |
| 2   | rs17270248 | 169674758 | T           | 0.09      | 0.06         | 5.13E-06          | 1.42         | (1.22-1.65) | 0.191                          | 0.888                     | (0.743-1.06) | 8.19E-03     |

|   |            |           |   |       |       |          |      |             |          |       |              |          |
|---|------------|-----------|---|-------|-------|----------|------|-------------|----------|-------|--------------|----------|
| 2 | rs6742549  | 231160095 | G | 0.63  | 0.59  | 1.39E-04 | 1.16 | (1.08-1.26) | 0.801    | 1.01  | (0.923-1.11) | 2.10E-03 |
| 3 | rs11716163 | 31782580  | T | 0.32  | 0.28  | 2.12E-05 | 1.2  | (1.10-1.30) | 0.133    | 0.927 | (0.839-1.02) | 2.23E-02 |
| 3 | rs17070791 | 64433972  | C | 0.036 | 0.024 | 1.50E-04 | 1.57 | (1.24-1.98) | 0.621    | 0.933 | (0.709-1.23) | 1.02E-02 |
| 3 | rs819848   | 157218708 | G | 0.32  | 0.29  | 4.60E-05 | 1.19 | (1.09-1.29) | 0.060    | 1.1   | (0.996-1.21) | 1.53E-05 |
| 3 | rs9812221  | 166709890 | C | 0.25  | 0.22  | 5.41E-05 | 1.21 | (1.10-1.32) | 0.503    | 1.04  | (0.931-1.16) | 4.33E-04 |
| 3 | rs7374644  | 172423777 | C | 0.72  | 0.68  | 3.13E-05 | 1.19 | (1.10-1.29) | 0.634    | 0.976 | (0.884-1.08) | 3.76E-03 |
| 3 | rs2636054  | 177849508 | T | 0.31  | 0.27  | 1.23E-04 | 1.18 | (1.08-1.28) | 0.958    | 1     | (0.907-1.11) | 2.96E-03 |
| 4 | rs4550900  | 155551224 | T | 0.26  | 0.23  | 1.08E-04 | 1.19 | (1.09-1.30) | 0.939    | 1     | (0.902-1.12) | 2.52E-03 |
| 4 | rs4057791  | 164444582 | A | 0.39  | 0.35  | 3.69E-05 | 1.18 | (1.09-1.28) | 0.333    | 1.05  | (0.954-1.15) | 1.65E-04 |
| 4 | rs11938564 | 187449128 | G | 0.26  | 0.23  | 1.42E-04 | 1.19 | (1.09-1.30) | 0.876    | 0.991 | (0.89-1.10)  | 4.71E-03 |
| 5 | rs702628   | 53432695  | C | 0.34  | 0.31  | 4.11E-05 | 1.18 | (1.09-1.29) | 0.619    | 1.02  | (0.93-1.13)  | 5.31E-04 |
| 5 | rs10053323 | 117897564 | C | 0.21  | 0.18  | 1.46E-04 | 1.21 | (1.09-1.33) | 0.385    | 1.05  | (0.938-1.18) | 5.38E-04 |
| 5 | rs2731672  | 176775080 | T | 0.27  | 0.24  | 1.64E-04 | 1.18 | (1.08-1.29) | 8.03E-03 | 1.15  | (1.04-1.28)  | 4.38E-06 |

|   |            |          |   |       |      |          |      |             |       |       |              |          |
|---|------------|----------|---|-------|------|----------|------|-------------|-------|-------|--------------|----------|
| 6 | rs9467504  | 25522304 | G | 0.18  | 0.15 | 9.79E-05 | 1.23 | (1.11-1.36) | 0.954 | 0.996 | (0.884-1.12) | 3.54E-03 |
| 6 | rs1892250  | 25877003 | C | 0.91  | 0.88 | 1.38E-04 | 1.27 | (1.12-1.44) | 0.020 | 1.19  | (1.03-1.37)  | 1.04E-05 |
| 6 | rs9393692  | 26384629 | G | 0.55  | 0.52 | 3.99E-05 | 1.17 | (1.09-1.27) | 0.382 | 1.04  | (0.951-1.14) | 2.17E-04 |
| 6 | rs13211507 | 28365356 | T | 0.906 | 0.88 | 5.85E-06 | 1.32 | (1.17-1.49) | 0.028 | 1.17  | (1.02-1.35)  | 1.09E-06 |
| 6 | rs9257809  | 29464310 | A | 0.902 | 0.87 | 2.78E-07 | 1.36 | (1.21-1.53) | 0.061 | 1.14  | (0.994-1.31) | 2.97E-07 |
| 6 | rs9261290  | 30146626 | T | 0.89  | 0.87 | 1.58E-06 | 1.32 | (1.18-1.48) | 0.151 | 1.1   | (0.965-1.26) | 4.56E-06 |
| 6 | rs9262143  | 30760760 | C | 0.88  | 0.85 | 4.27E-07 | 1.33 | (1.19-1.48) | 0.073 | 1.12  | (0.989-1.28) | 5.44E-07 |
| 6 | rs886403   | 31065597 | T | 0.74  | 0.71 | 4.47E-05 | 1.19 | (1.10-1.30) | 0.380 | 1.05  | (0.947-1.15) | 2.38E-04 |
| 6 | rs4143332  | 31456344 | G | 0.88  | 0.86 | 1.09E-04 | 1.25 | (1.11-1.39) | 0.242 | 1.08  | (0.949-1.23) | 2.21E-04 |
| 6 | rs2734583  | 31613459 | A | 0.88  | 0.86 | 2.37E-05 | 1.27 | (1.14-1.42) | 0.225 | 1.08  | (0.952-1.23) | 6.28E-05 |
| 6 | rs1270942  | 32026839 | A | 0.89  | 0.87 | 4.92E-05 | 1.27 | (1.13-1.43) | 0.558 | 1.04  | (0.91-1.19)  | 5.46E-04 |
| 6 | rs3129963  | 32488186 | A | 0.83  | 0.81 | 5.32E-05 | 1.22 | (1.11-1.35) | 0.506 | 1.04  | (0.927-1.17) | 4.42E-04 |
| 6 | rs9275686  | 32795548 | G | 0.8   | 0.77 | 9.52E-05 | 1.2  | (1.09-1.31) | 0.893 | 1.01  | (0.903-1.12) | 2.05E-03 |

|   |            |           |   |       |       |          |      |             |       |       |              |          |
|---|------------|-----------|---|-------|-------|----------|------|-------------|-------|-------|--------------|----------|
| 6 | rs924974   | 100869934 | T | 0.38  | 0.35  | 1.53E-04 | 1.17 | (1.08-1.26) | 0.311 | 0.953 | (0.867-1.05) | 2.58E-02 |
| 7 | rs2107785  | 80802211  | T | 0.913 | 0.89  | 1.41E-05 | 1.32 | (1.16-1.50) | 0.746 | 0.976 | (0.841-1.13) | 1.85E-03 |
| 7 | rs851727   | 146997887 | T | 0.962 | 0.946 | 1.45E-04 | 1.4  | (1.18-1.67) | 0.044 | 1.24  | (1.01-1.52)  | 2.63E-05 |
| 7 | rs1860218  | 153276785 | G | 0.34  | 0.31  | 5.20E-05 | 1.19 | (1.09-1.29) | 0.164 | 1.07  | (0.972-1.18) | 6.72E-05 |
| 7 | rs3734960  | 154315086 | C | 0.29  | 0.26  | 2.13E-05 | 1.21 | (1.11-1.32) | 0.037 | 1.11  | (1.01-1.23)  | 4.60E-06 |
| 7 | rs35936561 | 155880035 | A | 0.39  | 0.36  | 1.03E-05 | 1.19 | (1.10-1.29) | 0.276 | 1.05  | (0.96-1.15)  | 4.75E-05 |
| 8 | rs11993663 | 10070304  | A | 0.36  | 0.32  | 4.35E-05 | 1.19 | (1.09-1.29) | 0.709 | 1.02  | (0.926-1.12) | 8.04E-04 |
| 8 | rs12156009 | 11322629  | A | 0.54  | 0.5   | 5.73E-05 | 1.17 | (1.08-1.26) | 0.186 | 1.06  | (0.971-1.16) | 9.05E-05 |
| 8 | rs2898290  | 11471318  | T | 0.5   | 0.47  | 2.02E-04 | 1.16 | (1.07-1.25) | 0.062 | 1.09  | (0.996-1.19) | 5.38E-05 |
| 8 | rs13273672 | 11649790  | C | 0.34  | 0.3   | 8.20E-08 | 1.25 | (1.15-1.36) | 0.376 | 1.04  | (0.948-1.15) | 2.99E-06 |
| 8 | rs6998330  | 21284826  | T | 0.19  | 0.16  | 1.94E-04 | 1.21 | (1.10-1.34) | 0.376 | 0.948 | (0.842-1.07) | 2.40E-02 |
| 8 | rs12679938 | 59661239  | G | 0.33  | 0.3   | 1.93E-04 | 1.17 | (1.08-1.27) | 0.474 | 0.965 | (0.876-1.06) | 1.78E-02 |
| 8 | rs2954866  | 76048661  | A | 0.87  | 0.85  | 1.61E-04 | 1.23 | (1.11-1.38) | 0.601 | 0.966 | (0.85-1.10)  | 1.14E-02 |

|    |            |           |   |      |      |          |      |             |       |       |              |          |
|----|------------|-----------|---|------|------|----------|------|-------------|-------|-------|--------------|----------|
| 8  | rs2945756  | 134755247 | A | 0.35 | 0.32 | 1.94E-05 | 1.19 | (1.10-1.29) | 0.820 | 1.01  | (0.919-1.11) | 6.39E-04 |
| 8  | rs13272742 | 137348023 | A | 0.89 | 0.86 | 1.69E-04 | 1.24 | (1.11-1.39) | 0.490 | 0.955 | (0.836-1.09) | 1.57E-02 |
| 9  | rs1800651  | 70841425  | G | 0.28 | 0.24 | 9.70E-05 | 1.19 | (1.09-1.30) | 0.730 | 0.982 | (0.884-1.09) | 5.70E-03 |
| 9  | rs11265889 | 91532610  | A | 0.28 | 0.25 | 9.49E-05 | 1.19 | (1.09-1.29) | 0.300 | 0.947 | (0.855-1.05) | 2.05E-02 |
| 9  | rs9696872  | 92781054  | C | 0.66 | 0.62 | 8.87E-05 | 1.17 | (1.08-1.27) | 0.780 | 1.01  | (0.924-1.11) | 1.56E-03 |
| 9  | rs913913   | 99337413  | A | 0.25 | 0.22 | 1.44E-04 | 1.19 | (1.09-1.31) | 0.144 | 1.08  | (0.973-1.21) | 1.18E-04 |
| 9  | rs7861786  | 126041281 | G | 0.7  | 0.67 | 1.94E-04 | 1.17 | (1.08-1.26) | 0.210 | 0.94  | (0.853-1.04) | 4.02E-02 |
| 10 | rs6593440  | 44617535  | C | 0.9  | 0.87 | 3.63E-05 | 1.28 | (1.14-1.45) | 0.285 | 1.08  | (0.938-1.24) | 1.21E-04 |
| 10 | rs7091469  | 52742174  | T | 0.19 | 0.16 | 1.42E-05 | 1.25 | (1.13-1.39) | 0.758 | 0.981 | (0.869-1.11) | 1.75E-03 |
| 10 | rs7895043  | 71016742  | C | 0.49 | 0.46 | 8.41E-05 | 1.17 | (1.08-1.26) | 0.426 | 1.04  | (0.948-1.14) | 4.49E-04 |
| 11 | rs949538   | 88542052  | G | 0.93 | 0.91 | 1.49E-04 | 1.31 | (1.14-1.50) | 0.566 | 1.05  | (0.891-1.23) | 1.09E-03 |
| 11 | rs7116731  | 113835228 | A | 0.6  | 0.56 | 2.20E-05 | 1.18 | (1.09-1.27) | 0.304 | 0.953 | (0.87-1.04)  | 9.15E-03 |
| 11 | rs633040   | 131236636 | T | 0.68 | 0.63 | 1.61E-05 | 1.19 | (1.10-1.29) | 0.785 | 1.01  | (0.922-1.11) | 5.19E-04 |

|    |            |           |   |       |       |          |      |             |       |       |               |          |
|----|------------|-----------|---|-------|-------|----------|------|-------------|-------|-------|---------------|----------|
| 12 | rs2239073  | 2408761   | C | 0.44  | 0.41  | 3.47E-05 | 1.18 | (1.09-1.27) | 0.583 | 1.03  | (0.937-1.12)  | 4.45E-04 |
| 12 | rs2037744  | 16191109  | A | 0.14  | 0.11  | 7.54E-05 | 1.27 | (1.13-1.43) | 0.357 | 0.937 | (0.816-1.08)  | 1.56E-02 |
| 12 | rs10771272 | 26291854  | G | 0.84  | 0.81  | 1.82E-04 | 1.21 | (1.09-1.33) | 0.920 | 1.01  | (0.896-1.13)  | 3.49E-03 |
| 12 | rs11564281 | 38644957  | A | 0.13  | 0.11  | 1.22E-04 | 1.26 | (1.12-1.42) | 0.840 | 1.01  | (0.879-1.17)  | 2.06E-03 |
| 12 | rs4768467  | 41584140  | G | 0.77  | 0.74  | 4.87E-05 | 1.2  | (1.10-1.31) | 0.666 | 1.02  | (0.923-1.13)  | 7.43E-04 |
| 12 | rs11176874 | 66482939  | G | 0.48  | 0.45  | 7.71E-05 | 1.17 | (1.08-1.26) | 0.171 | 0.939 | (0.858-1.03)  | 3.44E-02 |
| 12 | rs17110081 | 70325202  | A | 0.15  | 0.13  | 1.47E-04 | 1.24 | (1.11-1.39) | 0.436 | 1.05  | (0.925-1.20)  | 7.10E-04 |
| 13 | rs9506800  | 21675161  | A | 0.36  | 0.32  | 1.64E-04 | 1.17 | (1.08-1.27) | 0.126 | 0.928 | (0.842-1.02)  | 5.66E-02 |
| 13 | rs3923500  | 85657509  | C | 0.82  | 0.78  | 1.88E-05 | 1.23 | (1.12-1.35) | 0.058 | 1.11  | (0.996-1.24)  | 7.69E-06 |
| 13 | rs1751036  | 94516666  | C | 0.051 | 0.038 | 7.97E-05 | 1.5  | (1.22-1.83) | 0.079 | 0.813 | (0.645-1.02)  | 6.67E-02 |
| 13 | rs7322495  | 109789286 | C | 0.27  | 0.24  | 7.84E-05 | 1.2  | (1.09-1.31) | 0.706 | 1.02  | (0.918-1.13)  | 1.08E-03 |
| 14 | rs12883673 | 80550575  | A | 0.9   | 0.88  | 1.60E-04 | 1.26 | (1.12-1.42) | 0.022 | 0.846 | (0.733-0.977) | 1.49E-01 |
| 15 | rs1820995  | 55120263  | A | 0.61  | 0.57  | 8.16E-05 | 1.17 | (1.08-1.26) | 0.782 | 0.987 | (0.902-1.08)  | 4.80E-03 |

|    |            |          |   |      |      |          |      |             |          |       |              |          |
|----|------------|----------|---|------|------|----------|------|-------------|----------|-------|--------------|----------|
| 15 | rs2218260  | 56001502 | C | 0.43 | 0.39 | 4.24E-05 | 1.17 | (1.09-1.27) | 0.047    | 1.1   | (1.00-1.20)  | 1.04E-05 |
| 15 | rs12148329 | 78788333 | G | 0.17 | 0.14 | 1.29E-04 | 1.22 | (1.10-1.36) | 0.126    | 0.906 | (0.799-1.03) | 4.75E-02 |
| 15 | rs1457853  | 93325178 | A | 0.38 | 0.34 | 6.06E-05 | 1.18 | (1.09-1.27) | 0.668    | 1.02  | (0.929-1.12) | 8.10E-04 |
| 15 | rs2535483  | 95357916 | T | 0.27 | 0.24 | 3.67E-05 | 1.2  | (1.10-1.31) | 0.108    | 1.09  | (0.981-1.21) | 2.65E-05 |
| 16 | rs2043633  | 5759275  | T | 0.63 | 0.59 | 6.04E-05 | 1.17 | (1.08-1.27) | 0.021    | 1.11  | (1.02-1.22)  | 5.21E-06 |
| 16 | rs7205607  | 7914506  | A | 0.41 | 0.37 | 1.49E-04 | 1.16 | (1.08-1.26) | 0.772    | 1.01  | (0.924-1.11) | 2.11E-03 |
| 16 | rs6497831  | 25233567 | T | 0.67 | 0.64 | 1.62E-04 | 1.17 | (1.08-1.26) | 0.640    | 1.02  | (0.931-1.12) | 1.48E-03 |
| 16 | rs9936833  | 84960619 | C | 0.42 | 0.38 | 8.18E-06 | 1.2  | (1.11-1.29) | 6.24E-05 | 1.21  | (1.10-1.32)  | 2.08E-09 |
| 17 | rs1105936  | 3857362  | G | 0.85 | 0.81 | 2.63E-05 | 1.24 | (1.12-1.37) | 0.540    | 0.965 | (0.86-1.08)  | 5.73E-03 |
| 17 | rs11658327 | 28991792 | C | 0.89 | 0.86 | 1.97E-05 | 1.28 | (1.14-1.43) | 0.692    | 0.974 | (0.857-1.11) | 3.27E-03 |
| 17 | rs1001865  | 78508277 | T | 0.3  | 0.27 | 1.78E-04 | 1.18 | (1.08-1.29) | 0.123    | 0.924 | (0.836-1.02) | 6.60E-02 |
| 18 | rs9955953  | 5760922  | A | 0.06 | 0.04 | 1.67E-04 | 1.42 | (1.18-1.70) | 0.747    | 0.966 | (0.784-1.19) | 8.42E-03 |
| 18 | rs17188857 | 21707077 | A | 0.85 | 0.82 | 2.02E-06 | 1.28 | (1.15-1.41) | 0.211    | 0.927 | (0.823-1.04) | 4.85E-03 |



|    |            |          |   |       |       |          |      |             |       |       |              |          |
|----|------------|----------|---|-------|-------|----------|------|-------------|-------|-------|--------------|----------|
| 18 | rs7233779  | 30697224 | G | 0.88  | 0.85  | 1.43E-04 | 1.23 | (1.11-1.37) | 0.661 | 1.03  | (0.904-1.17) | 1.33E-03 |
| 18 | rs12956753 | 65544165 | T | 0.24  | 0.21  | 1.26E-04 | 1.2  | (1.09-1.31) | 0.839 | 1.01  | (0.907-1.13) | 2.31E-03 |
| 19 | rs10423674 | 18678903 | C | 0.7   | 0.66  | 5.14E-05 | 1.18 | (1.09-1.28) | 0.412 | 1.04  | (0.946-1.14) | 3.00E-04 |
| 19 | rs4802138  | 47696238 | T | 0.28  | 0.24  | 2.04E-04 | 1.18 | (1.08-1.29) | 0.800 | 1.01  | (0.913-1.12) | 2.67E-03 |
| 19 | rs17835915 | 57399786 | A | 0.17  | 0.15  | 1.18E-04 | 1.23 | (1.11-1.37) | 0.171 | 0.916 | (0.809-1.04) | 4.10E-02 |
| 20 | rs6039511  | 958089   | T | 0.07  | 0.05  | 1.94E-04 | 1.37 | (1.16-1.62) | 0.373 | 0.913 | (0.746-1.12) | 2.10E-02 |
| 20 | rs4814019  | 11456980 | C | 0.34  | 0.3   | 4.01E-06 | 1.21 | (1.12-1.32) | 0.419 | 0.96  | (0.87-1.06)  | 2.40E-03 |
| 21 | rs3916645  | 9884717  | A | 0.035 | 0.023 | 7.09E-05 | 1.64 | (1.28-2.09) | 0.759 | 0.952 | (0.697-1.30) | 3.25E-03 |
| 21 | rs2824400  | 17920408 | A | 0.64  | 0.59  | 9.35E-06 | 1.19 | (1.10-1.29) | 0.782 | 1.01  | (0.925-1.11) | 3.90E-04 |
| 22 | rs8136975  | 48313720 | C | 0.41  | 0.38  | 1.60E-04 | 1.16 | (1.07-1.26) | 0.444 | 0.964 | (0.879-1.06) | 1.68E-02 |

**Supplementary Table 5** All additional loci at which replication was attempted in the Stage 1 and Stage 2 replication

(Results for lead SNPs on 6p21 and 16q24 are presented in Table 1).

| Chr | rsID       | Position  | Risk allele | Discovery |              |                       |              |             | Stage 1 replication P value | Stage 2 replication P value | Meta P                |
|-----|------------|-----------|-------------|-----------|--------------|-----------------------|--------------|-------------|-----------------------------|-----------------------------|-----------------------|
|     |            |           |             | Cases RAF | Controls RAF | Discovery P value     | Discovery OR | 95% CI      |                             |                             |                       |
| 1   | rs7513382  | 158638733 | C           | 0.496     | 0.463        | 1.29x10 <sup>-4</sup> | 1.16         | (1.08-1.25) | 0.103                       | (-) 0.0370                  | 3.95x10 <sup>-3</sup> |
| 2   | rs3072     | 20741887  | G           | 0.408     | 0.363        | 2.64x10 <sup>-7</sup> | 1.23         | (1.14-1.33) | 0.222                       | 0.0180                      | 1.45x10 <sup>-7</sup> |
| 5   | rs2731672  | 176775080 | A           | 0.274     | 0.240        | 1.64x10 <sup>-4</sup> | 1.18         | (1.08-1.29) | 8.03x10 <sup>-3</sup>       | 0.289                       | 3.24x10 <sup>-6</sup> |
| 6   | rs13211507 | 28365356  | A           | 0.906     | 0.880        | 5.85x10 <sup>-6</sup> | 1.32         | (1.17-1.49) | 0.028                       | 1.02x10 <sup>-3</sup>       | 8.77x10 <sup>-9</sup> |
| 6   | rs9262143  | 30760760  | G           | 0.882     | 0.852        | 4.27x10 <sup>-7</sup> | 1.33         | (1.19-1.48) | 0.073                       | 0.0111                      | 2.18x10 <sup>-8</sup> |
| 7   | rs1860218  | 153276785 | G           | 0.338     | 0.306        | 5.20x10 <sup>-5</sup> | 1.19         | (1.09-1.29) | 0.164                       | (-) 0.111                   | 2.20x10 <sup>-3</sup> |
| 7   | rs3734960  | 154315086 | G           | 0.292     | 0.259        | 2.13x10 <sup>-5</sup> | 1.21         | (1.11-1.32) | 0.037                       | 0.340                       | 3.97x10 <sup>-6</sup> |
| 8   | rs13273672 | 11649790  | G           | 0.344     | 0.301        | 8.20x10 <sup>-8</sup> | 1.25         | (1.15-1.36) | 0.376                       | (-) 0.619                   | 3.43x10 <sup>-5</sup> |
| 8   | rs8180912  | 11677400  | A           | 0.224     | 0.191        | 3.63x10 <sup>-6</sup> | 1.25         | (1.14-1.37) | 0.163                       | 0.966                       | 3.47x10 <sup>-5</sup> |
| 13  | rs3923500  | 85657509  | G           | 0.818     | 0.785        | 1.88x10 <sup>-5</sup> | 1.23         | (1.12-1.35) | 0.058                       | 0.0340                      | 7.77x10 <sup>-7</sup> |
| 15  | rs2218260  | 56001502  | G           | 0.433     | 0.393        | 4.24x10 <sup>-5</sup> | 1.17         | (1.09-1.27) | 0.047                       | 0.261                       | 6.50x10 <sup>-6</sup> |
| 15  | rs2535483  | 95357916  | A           | 0.273     | 0.238        | 3.67x10 <sup>-5</sup> | 1.2          | (1.10-1.31) | 0.108                       | 0.0105                      | 1.22x10 <sup>-6</sup> |
| 16  | rs2043633  | 5759275   | A           | 0.629     | 0.588        | 6.04x10 <sup>-5</sup> | 1.17         | (1.08-1.27) | 0.021                       | 0.0177                      | 3.12x10 <sup>-7</sup> |
| 19  | rs10423674 | 18678903  | G           | 0.700     | 0.661        | 5.14x10 <sup>-5</sup> | 1.18         | (1.09-1.28) | 0.412                       | 0.564                       | 3.56x10 <sup>-4</sup> |

(-) Direction of risk opposite to that in the discovery population. All P values are 2-sided.

**Supplementary Table 6** Table of association with imputed classical HLA alleles.

| HLA allele      | Discovery   |             |                         |              |             |                               | Stage 1 UK Replication |             |                         |             |             |                               | Combined    |             |                               |
|-----------------|-------------|-------------|-------------------------|--------------|-------------|-------------------------------|------------------------|-------------|-------------------------|-------------|-------------|-------------------------------|-------------|-------------|-------------------------------|
|                 | Case MAF    | Con MAF     | missing data proportion | Beta         | SE          | P value                       | Case MAF               | Con MAF     | missing data proportion | Beta        | SE          | P value                       | Beta        | SE          | P value                       |
| HLADQB*201      | 0.13        | 0.15        | 0.02                    | -0.20        | 0.06        | 4.36 x 10 <sup>-4</sup>       | 0.17                   | 0.16        | 0.10                    | 0.03        | 0.07        | 6.70 x 10 <sup>-1</sup>       | -0.10       | 0.04        | 1.67 x 10 <sup>-2</sup>       |
| <b>HLAC*701</b> | <b>0.15</b> | <b>0.18</b> | <b>0.02</b>             | <b>-0.18</b> | <b>0.05</b> | <b>4.96 x 10<sup>-4</sup></b> | <b>0.01</b>            | <b>0.01</b> | <b>0.05</b>             | <b>0.21</b> | <b>0.30</b> | <b>4.79 x 10<sup>-1</sup></b> | <b>0.35</b> | <b>0.19</b> | <b>6.44 x 10<sup>-2</sup></b> |
| <b>HLAB*801</b> | <b>0.13</b> | <b>0.15</b> | <b>0.05</b>             | <b>-0.20</b> | <b>0.06</b> | <b>5.88 x 10<sup>-4</sup></b> | <b>0.13</b>            | <b>0.14</b> | <b>0.03</b>             | <b>0.11</b> | <b>0.07</b> | <b>1.10 x 10<sup>-1</sup></b> | <b>0.02</b> | <b>0.10</b> | <b>8.66 x 10<sup>-1</sup></b> |
| HLAC*1701       | 0.01        | 0.01        | 0.02                    | 0.72         | 0.24        | 2.96 x 10 <sup>-3</sup>       | 0.01                   | 0.01        | 0.05                    | -0.21       | 0.30        | 4.79 x 10 <sup>-1</sup>       | 0.35        | 0.19        | 6.44 x 10 <sup>-2</sup>       |
| <b>HLAA*101</b> | <b>0.18</b> | <b>0.20</b> | <b>0.03</b>             | <b>-0.13</b> | <b>0.05</b> | <b>7.49 x 10<sup>-3</sup></b> | <b>0.18</b>            | <b>0.19</b> | <b>0.06</b>             | <b>0.07</b> | <b>0.06</b> | <b>2.53 x 10<sup>-1</sup></b> | <b>0.11</b> | <b>0.04</b> | <b>5.26 x 10<sup>-3</sup></b> |
| HLADQB*602      | 0.16        | 0.14        | 0.02                    | 0.15         | 0.06        | 7.86 x 10 <sup>-3</sup>       | 0.13                   | 0.14        | 0.10                    | -0.01       | 0.07        | 8.61 x 10 <sup>-1</sup>       | 0.09        | 0.04        | 4.71 x 10 <sup>-2</sup>       |
| HLADQA*501      | 0.22        | 0.24        | 0.05                    | -0.12        | 0.05        | 1.31 x 10 <sup>-2</sup>       | 0.22                   | 0.24        | 0.06                    | -0.11       | 0.06        | 3.99 x 10 <sup>-2</sup>       | -0.11       | 0.04        | 1.28 x 10 <sup>-3</sup>       |
| HLADQA*102      | 0.20        | 0.18        | 0.05                    | 0.10         | 0.05        | 3.87 x 10 <sup>-2</sup>       | 0.19                   | 0.18        | 0.06                    | 0.04        | 0.06        | 5.53 x 10 <sup>-1</sup>       | 0.08        | 0.04        | 4.95 x 10 <sup>-2</sup>       |
| HLAA*2501       | 0.03        | 0.02        | 0.03                    | 0.26         | 0.13        | 4.77 x 10 <sup>-2</sup>       | 0.02                   | 0.02        | 0.06                    | 0.21        | 0.19        | 2.61x 10 <sup>-1</sup>        | 0.24        | 0.11        | 2.33x 10 <sup>-2</sup>        |

HLA alleles shown in bold also showed evidence of a protective effect on disease risk when analysed using GENECLUSTER.  $\log_{10}BF = 3.71$  for the single mutation mode

**Supplementary Table 7A** Table of association at rs9257809 (chromosome 6) with only the cases that have intestinal metaplasia

| Cohort      | Beta          | SE           | P value                     | N cases | N controls | p-het |
|-------------|---------------|--------------|-----------------------------|---------|------------|-------|
| Discovery   | -0.294        | 0.062        | 2.04x 10 <sup>-6</sup>      | 1662    | 5172       |       |
| Stage 1     | -0.214        | 0.084        | 0.011                       | 734     | 6819       |       |
| Stage 2     | -0.389        | 0.122        | 0.001                       | 379     | 1780       |       |
| UK rep2     | -0.126        | 0.0808       | 0.118                       | 1318    | 1586       |       |
| Irish       | 0.045         | 0.153        | 0.767                       | 245     | 473        |       |
| BEACON      | -0.125        | 0.072        | 0.083                       | 2396    | 2167       |       |
| <b>meta</b> | <b>-0.201</b> | <b>0.034</b> | <b>3.87x10<sup>-9</sup></b> |         |            | 0.063 |

**Supplementary Table 7B** Table of association at rs9936833 (chromosome 16) with only the cases that have intestinal metaplasia

| _           | Beta         | SE           | P value                      | N cases | N controls | p-het |
|-------------|--------------|--------------|------------------------------|---------|------------|-------|
| Discovery   | 0.182        | 0.042        | 1.37 x10 <sup>-5</sup>       | 1662    | 5172       |       |
| Stage 1     | 0.198        | 0.056        | 4.58 x10 <sup>-4</sup>       | 734     | 6819       |       |
| Stage 2     | 0.122        | 0.086        | 0.154                        | 379     | 1780       |       |
| UK rep2     | 0.005        | 0.054        | 0.931                        | 1318    | 1586       |       |
| Irish       | 0.083        | 0.114        | 0.468                        | 245     | 473        |       |
| BEACON      | 0.151        | 0.043        | 5.02 x 10 <sup>-4</sup>      | 2397    | 2165       |       |
| <b>meta</b> | <b>0.139</b> | <b>0.023</b> | <b>8.51x10<sup>-10</sup></b> |         |            | 0.137 |

**Supplementary Table 8** Results for SNPs associated with Circumference (C) and Maximal length (M) measurement of the Barrett's segment at  $P < 10^{-5}$ .

SNPs associated with C measurements

| Chr | rsID       | Position  | Discovery |    |      |       |      |                       |
|-----|------------|-----------|-----------|----|------|-------|------|-----------------------|
|     |            |           | A1        | A2 | MAF  | Beta  | SE   | P value               |
| 3   | rs1912785  | 147884861 | A         | G  | 0.41 | -0.15 | 0.03 | $7.81 \times 10^{-6}$ |
| 12  | rs1531228  | 13520648  | A         | G  | 0.14 | 0.20  | 0.05 | $9.40 \times 10^{-6}$ |
| 15  | rs12901001 | 84660480  | A         | G  | 0.35 | 0.15  | 0.03 | $5.50 \times 10^{-6}$ |

SNPs associated with M measurements

| Chr | rsID       | Position  | A1 | A2 | Discovery |       |      |                       | Stage 1<br>UK Replication |      |      | Stage 2<br>Dutch Replication |      |      | Meta  |      |                       |
|-----|------------|-----------|----|----|-----------|-------|------|-----------------------|---------------------------|------|------|------------------------------|------|------|-------|------|-----------------------|
|     |            |           |    |    | MAF       | Beta  | SE   | P                     | Beta                      | SE   | P    | Beta                         | SE   | P    | Beta  | SE   | P                     |
| 9   | rs10123313 | 4278098   | A  | G  | 0.01      | -0.72 | 0.14 | $1.62 \times 10^{-7}$ | -0.13                     | 0.18 | 0.48 | 0.16                         | 0.41 | 0.70 | -0.45 | 0.10 | $1.53 \times 10^{-5}$ |
| 5   | rs1004385  | 111706536 | A  | G  | 0.11      | 0.25  | 0.05 | $1.21 \times 10^{-6}$ |                           |      |      |                              |      |      |       |      |                       |
| 5   | rs6594591  | 111719360 | A  | G  | 0.10      | -0.24 | 0.05 | $6.14 \times 10^{-6}$ |                           |      |      |                              |      |      |       |      |                       |
| 5   | rs821735   | 111695471 | A  | C  | 0.11      | -0.23 | 0.05 | $7.68 \times 10^{-6}$ |                           |      |      |                              |      |      |       |      |                       |
| 12  | rs12425938 | 60770659  | A  | G  | 0.15      | -0.19 | 0.04 | $8.91 \times 10^{-6}$ |                           |      |      |                              |      |      |       |      |                       |
| 12  | rs9669389  | 60776776  | A  | G  | 0.15      | -0.19 | 0.04 | $9.26 \times 10^{-6}$ |                           |      |      |                              |      |      |       |      |                       |

**Supplementary Table 9** Sex-stratified analysis of 16 SNPs for which replication was attempted

Male-only analysis (M): Discovery: 1488 cases, 2611 controls. UK replication: 785 cases, 3270 controls. NL replication: 350 cases, 1054 controls. Female-only analysis (F): Discovery 364 cases, 2564 controls. UK replication: 319 cases, 3512 controls. NL replication: 123 cases, 726 controls.

| rsID       | Sex | Risk allele | Discovery           |                       | Stage 1 UK Replication |                       | Stage 2 Dutch Replication |                       | Meta                |                        | P <sub>interaction</sub> |        |       |      |
|------------|-----|-------------|---------------------|-----------------------|------------------------|-----------------------|---------------------------|-----------------------|---------------------|------------------------|--------------------------|--------|-------|------|
|            |     |             | OR (95%CI)          | P                     | OR                     | P                     | OR                        | P                     | OR                  | P                      | Dis                      | UK rep | D rep | Meta |
| rs7513382  | M   | C           | 1.17<br>(1.07-1.28) | 9.63x10 <sup>-4</sup> | 1.04<br>(0.93-1.17)    | 0.44                  | 0.81<br>(0.68-0.96)       | 0.01                  | 1.06<br>(1-1.14)    | 0.07                   | 0.38                     | 0.37   | 0.21  | 0.13 |
|            | F   | C           | 1.25<br>(1.07-1.46) | 5.69x10 <sup>-3</sup> | 1.14<br>(0.97-1.33)    | 6.29x10 <sup>-3</sup> | 0.98<br>(0.75-1.28)       | 0.90                  | 1.16<br>(1.05-1.29) | 4.53x10 <sup>-3</sup>  |                          |        |       |      |
| rs3072     | M   | G           | 1.24<br>(1.13-1.37) | 5.96x10 <sup>-6</sup> | 1.03<br>(0.92-1.16)    | 0.56                  | 1.24<br>(1.04-1.48)       | 0.01                  | 1.17<br>(1.09-1.25) | 6.60x10 <sup>-6</sup>  | 0.52                     | 0.83   | 0.51  | 0.57 |
|            | F   | G           | 1.16<br>(0.98-1.37) | 0.08                  | 1.05<br>(0.89-1.25)    | 0.08                  | 1.11<br>(0.84-1.47)       | 0.45                  | 1.11<br>(1-1.24)    | 0.06                   |                          |        |       |      |
| rs2731672  | M   | A           | 1.11<br>(1-1.23)    | 0.05                  | 1.12<br>(0.99-1.28)    | 0.07                  | 1.09<br>(0.89-1.33)       | 0.43                  | 1.10<br>(1.03-1.19) | 7.12x10 <sup>-3</sup>  | 0.04                     | 0.42   | 0.55  | 0.02 |
|            | F   | A           | 1.39<br>(1.16-1.67) | 3.17x10 <sup>-4</sup> | 1.24<br>(1.03-1.50)    | 2.05x10 <sup>-4</sup> | 1.22<br>(0.9-1.64)        | 0.20                  | 1.29<br>(1.15-1.46) | 1.98x10 <sup>-5</sup>  |                          |        |       |      |
| rs13211507 | M   | A           | 1.43<br>(1.23-1.64) | 1.73x10 <sup>-6</sup> | 1.25<br>(1.05-1.50)    | 0.01                  | 1.42<br>(1.08-1.87)       | 0.01                  | 1.36<br>(1.23-1.51) | 4.52x10 <sup>-9</sup>  | 0.11                     | 0.15   | 0.79  | 0.05 |
|            | F   | A           | 1.14<br>(0.88-1.45) | 0.32                  | 1<br>(0.78-1.29)       | 0.3                   | 1.5<br>(0.99-2.26)        | 0.06                  | 1.13<br>(0.96-1.33) | 0.14                   |                          |        |       |      |
| rs9257809  | M   | A           | 1.47<br>(1.28-1.69) | 5.26x10 <sup>-8</sup> | 1.23<br>(1.04-1.46)    | 0.02                  | 1.46<br>(1.12-1.9)        | 4.76x10 <sup>-3</sup> | 1.38<br>(1.25-1.53) | 1.71x10 <sup>-10</sup> | 0.09                     | 0.12   | 0.79  | 0.01 |
|            | F   | A           | 1.16<br>(0.91-1.47) | 0.23                  | 1.03<br>(1.31-80)      | 0.24                  | 1.37<br>(0.91-2.05)       | 0.13                  | 1.11<br>(0.95-1.3)  | 0.19                   |                          |        |       |      |

|            |   |   |                     |                       |                     |                       |                     |      |                     |                       |      |      |      |      |
|------------|---|---|---------------------|-----------------------|---------------------|-----------------------|---------------------|------|---------------------|-----------------------|------|------|------|------|
| rs9262143  | M | G | 1.40<br>(1.23-1.6)  | 3.92x10 <sup>-7</sup> | 1.2<br>(1.02-1.41)  | 0.02                  | 1.31<br>(1.02-1.68) | 0.04 | 1.32<br>(1.2-1.45)  | 8.94x10 <sup>-9</sup> | 0.37 | 0.11 | 0.92 | 0.07 |
|            | F | G | 1.25<br>(1-1.57)    | 0.05                  | 1.05<br>(0.84-1.32) | 0.06                  | 1.27<br>(0.87-1.85) | 0.21 | 1.13<br>(0.97-1.31) | 0.12                  |      |      |      |      |
| rs1860218  | M | G | 1.18<br>(1.07-1.31) | 8.39x10 <sup>-4</sup> | 1.07<br>(0.95-1.21) | 0.26                  | 0.88<br>(0.74-1.05) | 0.17 | 1.09<br>(1.02-1.17) | 0.01                  | 0.59 | 0.96 | 0.99 | 0.73 |
|            | F | G | 1.22<br>(1.03-1.44) | 0.02                  | 1.08<br>(0.91-1.29) | 0.03                  | 0.88<br>(0.66-1.17) | 0.37 | 1.1<br>(0.98-1.23)  | 0.10                  |      |      |      |      |
| rs3734960  | M | G | 1.18<br>(1.07-1.31) | 1.49x10 <sup>-3</sup> | 1.08<br>(0.96-1.22) | 0.2                   | 1.13<br>(0.92-1.38) | 0.24 | 1.14<br>(1.06-1.23) | 5.43x10 <sup>-4</sup> | 0.90 | 0.87 | 0.58 | 0.96 |
|            | F | G | 1.21<br>(1.01-1.45) | 0.04                  | 1.1<br>(0.91-1.32)  | 0.05                  | 1.01<br>(0.74-1.38) | 0.93 | 1.13<br>(1.01-1.28) | 0.04                  |      |      |      |      |
| rs13273672 | M | G | 1.25<br>(1.13-1.37) | 8.07x10 <sup>-6</sup> | 1<br>(0.89-1.13)    | 0.93                  | 1.08<br>(0.9-1.31)  | 0.39 | 1.13<br>(1.06-1.22) | 3.56x10 <sup>-4</sup> | 0.83 | 0.56 | 0.02 | 0.43 |
|            | F | G | 1.24<br>(1.04-1.47) | 0.01                  | 1.07<br>(0.90-1.28) | 0.02                  | 1.39<br>(1.05-1.85) | 0.02 | 1.07<br>(0.96-1.2)  | 0.23                  |      |      |      |      |
| rs8180912  | M | A | 1.22<br>(1.09-1.37) | 5.27x10 <sup>-4</sup> | 1.08<br>(0.94-1.24) | 0.27                  | 1.14<br>(0.92-1.42) | 0.22 | 1.15<br>(1.07-1.26) | 3.36x10 <sup>-4</sup> | 0.81 | 0.64 | 0.04 | 0.38 |
|            | F | A | 1.30<br>(1.06-1.59) | 9.95x10 <sup>-3</sup> | 1.02<br>(0.83-1.26) | 0.02                  | 0.76<br>(1.06-0.54) | 0.11 | 1.08<br>(0.95-1.23) | 0.25                  |      |      |      |      |
| rs3923500  | M | G | 1.18<br>(1.05-1.32) | 5.09x10 <sup>-3</sup> | 1.11<br>(0.97-1.27) | 0.14                  | 1.18<br>(0.95-1.45) | 0.13 | 1.15<br>(1.06-1.25) | 6.56x10 <sup>-4</sup> | 0.30 | 0.74 | 0.49 | 0.25 |
|            | F | G | 1.33<br>(1.1-1.61)  | 3.09x10 <sup>-3</sup> | 1.15<br>(0.95-1.40) | 5.34x10 <sup>-3</sup> | 1.34<br>(0.96-1.89) | 0.09 | 1.25<br>(1.1-1.42)  | 4.79x10 <sup>-4</sup> |      |      |      |      |
| rs2218260  | M | G | 1.19<br>(1.09-1.31) | 2.23x10 <sup>-4</sup> | 1.13<br>(1.01-1.26) | 0.04                  | 1.11<br>(0.93-1.32) | 0.24 | 1.16<br>(1.08-1.24) | 1.66x10 <sup>-5</sup> | 0.35 | 0.31 | 0.58 | 0.11 |
|            | F | G | 1.11<br>(0.95-1.29) | 0.20                  | 1.02<br>(0.86-1.20) | 0.25                  | 1.01<br>(0.77-1.33) | 0.93 | 1.06<br>(0.95-1.17) | 0.31                  |      |      |      |      |
| rs2535483  | M | A | 1.16<br>(1.05-1.28) | 4.29x10 <sup>-3</sup> | 1.12<br>(0.98-1.27) | 0.09                  | 1.18<br>(0.97-1.44) | 0.09 | 1.15<br>(1.07-1.24) | 2.51x10 <sup>-4</sup> | 0.15 | 0.33 | 0.46 | 0.52 |
|            | F | A | 1.35<br>(1.12-1.61) | 1.45x10 <sup>-3</sup> | 1<br>(0.83-1.22)    | 1.66x10 <sup>-3</sup> | 1.37<br>(1-1.88)    | 0.05 | 1.19<br>(1.06-1.35) | 4.49x10 <sup>-3</sup> |      |      |      |      |

|            |   |   |                     |                       |                     |                       |                     |      |                     |                       |      |      |      |      |
|------------|---|---|---------------------|-----------------------|---------------------|-----------------------|---------------------|------|---------------------|-----------------------|------|------|------|------|
| rs2043633  | M | A | 1.11<br>(1.01-1.2)  | 0.04                  | 1.12<br>(1.00-1.26) | 0.04                  | 1.23<br>(1.04-1.45) | 0.02 | 1.12<br>(1.06-1.2)  | 3.23x10 <sup>-4</sup> | 0.06 | 0.66 | 0.46 | 0.51 |
|            | F | A | 1.35<br>(1.16-1.59) | 1.80x10 <sup>-4</sup> | 1.07<br>(0.91-1.26) | 1.67x10 <sup>-4</sup> | 1.09<br>(0.83-1.43) | 0.55 | 1.19<br>(1.07-1.32) | 1.15x10 <sup>-3</sup> |      |      |      |      |
| rs9936833  | M | G | 1.19<br>(1.08-1.30) | 3.56x10 <sup>-4</sup> | 1.18<br>(1.05-1.32) | 4.06x10 <sup>-3</sup> | 1.16<br>(0.96-1.39) | 0.12 | 1.18<br>(1.1-1.26)  | 1.64x10 <sup>-6</sup> | 0.72 | 0.61 | 0.09 | 0.84 |
|            | F | G | 1.25<br>(1.06-1.47) | 6.98x10 <sup>-3</sup> | 1.24<br>(1.05-1.47) | 8.15x10 <sup>-3</sup> | 0.86<br>(0.64-1.15) | 0.31 | 1.18<br>(1.06-1.32) | 2.29x10 <sup>-3</sup> |      |      |      |      |
| rs10423674 | M | C | 1.15<br>(1.04-1.27) | 6.06x10 <sup>-3</sup> | 1<br>(0.89-1.13)    | 0.93                  | 0.98<br>(0.81-1.18) | 0.80 | 1.07<br>(1-1.15)    | 0.05                  | 0.48 | 0.27 | 0.30 | 0.19 |
|            | F | C | 1.23<br>(1.04-1.44) | 0.02                  | 1.14<br>(0.96-1.35) | 0.01                  | 1.17<br>(0.88-1.56) | 0.29 | 1.18<br>(1.05-1.31) | 3.76x10 <sup>-3</sup> |      |      |      |      |



**Supplementary Table 10A** Results for SNPs associated with body mass index (BMI) or waist-hip ratio (WHR) that are genotyped in the discovery data. Risk alleles are given for the forward strand.

| Chr | rsID       | Position    | Phenotype | Risk Allele | Gene              | Reference | Discovery Risk allele | Discovery P value     |
|-----|------------|-------------|-----------|-------------|-------------------|-----------|-----------------------|-----------------------|
| 1   | rs1514175  | 74,764,232  | BMI       | A           | <i>TNNI3K</i>     | 1         | A                     | 0.0780                |
| 1   | rs1011731  | 170,613,171 | WHR       | G           | <i>DNM3-PIGC</i>  | 2         | G                     | 0.752                 |
| 2   | rs2867125  | 612,827     | BMI       | C           | <i>TMEM18</i>     | 1         | T                     | 0.846                 |
| 2   | rs10195252 | 165,221,337 | WHR       | T           | <i>GRB14</i>      | 2         | C                     | 0.553                 |
| 3   | rs6795735  | 64,680,405  | WHR       | C           | <i>ADAMTS9</i>    | 2         | C                     | 0.255                 |
| 3   | rs13078807 | 85,966,840  | BMI       | G           | <i>CADM2</i>      | 1         | G                     | 0.0910                |
| 4   | rs13107325 | 103,407,732 | BMI       | T           | <i>SLC39A8</i>    | 1         | C                     | 0.897                 |
| 6   | rs987237   | 50,911,009  | BMI/WC    | G           | <i>TFAP2B</i>     | 3         | G                     | 0.113                 |
| 7   | rs1055144  | 25,837,634  | WHR       | T           | <i>NFE2L3</i>     | 2         | T                     | 0.407                 |
| 9   | rs10968576 | 28,404,339  | BMI       | G           | <i>LRRN6C</i>     | 1         | G                     | 0.0858                |
| 12  | rs718314   | 26,344,550  | WHR       | G           | <i>ITPR2-SSPN</i> | 3         | A                     | 0.756                 |
| 12  | rs7138803  | 48,533,735  | BMI       | A           | <i>FAIM2</i>      | 1         | A                     | 0.647                 |
| 12  | rs1443512  | 52,628,951  | WHR       | A           | <i>HOXC13</i>     | 3         | A                     | 0.0806                |
| 14  | rs10146997 | 79,014,915  | BMI/WC    | G           | <i>NRXN3</i>      | 4         | G                     | 9.63x10 <sup>-3</sup> |
| 15  | rs2241423  | 65,873,892  | BMI       | G           | <i>MAP2K5</i>     | 1         | G                     | 0.142                 |
| 18  | rs571312   | 55,990,749  | BMI       | A           | <i>MC4R</i>       | 1         | A                     | 0.0888                |
| 18  | rs12970134 | 56,035,730  | BMI/WC    | A           | <i>MC4R</i>       | 5         | A                     | 0.0991                |
| 19  | rs29941    | 39,001,372  | BMI       | G           | <i>KCTD15</i>     | 1         | A                     | 0.623                 |
| 19  | rs2287019  | 50,894,012  | BMI       | C           | <i>QPCTL</i>      | 1         | C                     | 0.0932                |

**Supplementary Table 10B** Results in the BE discovery scan for tags of SNPs associated with BMI or WHR that were not genotyped in the discovery data. The genotyped tag SNPs are within 250kb and with  $r^2 > 0.8$  (according to 1000G CEU pilot1 June release). Risk alleles are given for the forward strand.

| Chr | rsID       | Position    | Phenotype | Risk Allele | Gene                    | Reference | Tag SNP ( $r^2$ )    | Tagged risk allele | Tag SNP P value |
|-----|------------|-------------|-----------|-------------|-------------------------|-----------|----------------------|--------------------|-----------------|
| 1   | rs2815752  | 72,585,028  | BMI       | A           | <i>NEGR1</i>            | 1         | rs3101336<br>(0.96)  | A                  | 0.773           |
| 1   | rs1555543  | 96,717,385  | BMI       | C           | <i>PTBP2</i>            | 1         | rs11165643<br>(1)    | C                  | 0.240           |
| 1   | rs984222   | 119,305,366 | WHR       | G           | <i>TBX15-<br/>WARS2</i> | 2         | rs10923724<br>(0.85) | G                  | 0.452           |
| 1   | rs543874   | 176,156,103 | BMI       | G           | <i>SEC16B</i>           | 1         | rs10913469<br>(0.96) | G                  | 0.944           |
| 2   | rs713586   | 25,011,512  | BMI       | C           | <i>RBJ</i>              | 1         | rs6752378<br>(1)     | T                  | 0.427           |
| 2   | rs887912   | 59,156,381  | BMI       | T           | <i>FANCL</i>            | 1         | rs759250<br>(0.92)   | T                  | 0.929           |
| 4   | rs10938397 | 44,877,284  | BMI       | G           | <i>GNPDA2</i>           | 1         | rs12641981<br>(0.90) | A                  | 0.764           |
| 5   | rs2112347  | 75,050,998  | BMI       | T           | <i>FLJ35779</i>         | 1         | rs253414<br>(0.81)   | T                  | 0.497           |
| 5   | rs4836133  | 124,360,002 | BMI       | A           | <i>ZNF608</i>           | 1         | rs6864049<br>(1)     | A                  | 0.0840          |
| 5   | rs6861681  | 173,295,064 | WHR       | A           | <i>CPEB4</i>            | 2         | rs7736263<br>(1)     | A                  | 0.386           |
| 6   | rs1294421  | 6,688,148   | WHR       | G           | <i>LY86</i>             | 2         | rs1294433<br>(0.81)  | T                  | 0.977           |
| 6   | rs206936   | 34,410,847  | BMI       | G           | <i>NUDT3</i>            | 1         | rs3798560<br>(1)     | G                  | 0.711           |
| 6   | rs9491696  | 127,494,332 | WHR       | G           | <i>RSPO3</i>            | 2         | rs7766106<br>(0.96)  | G                  | 0.790           |
| 11  | rs4929949  | 8,561,169   | BMI       | C           | <i>RPL27A</i>           | 1         | rs725502<br>(0.87)   | T                  | 0.784           |
| 11  | rs10767664 | 27,682,562  | BMI       | A           | <i>BDNF</i>             | 1         | rs11030104<br>(0.90) | A                  | 0.0308          |
| 11  | rs3817334  | 47,607,569  | BMI       | T           | <i>MTCH2</i>            | 1         | rs7124681            | T                  | 0.162           |

|    |            |            |     |   |                           |   |                      |   |        |
|----|------------|------------|-----|---|---------------------------|---|----------------------|---|--------|
|    |            |            |     |   |                           |   | (0.94)               |   |        |
| 16 | rs12444979 | 19,841,101 | BMI | C | <i>GPRC5B</i>             | 1 | rs12446632<br>(0.88) | C | 0.0892 |
| 16 | rs7359397  | 28,793,160 | BMI | T | <i>SH2B1</i>              | 1 | rs4788102<br>(0.96)  | C | 0.633  |
| 16 | rs1558902  | 52,361,075 | BMI | A | <i>FTO</i>                | 1 | rs9930333<br>(0.90)  | A | 0.571  |
| 19 | rs3810291  | 52,260,843 | BMI | A | <i>TMEM160</i>            | 1 | rs2303108<br>(1)     | G | 0.0244 |
| 22 | rs4823006  | 27,781,671 | WHR | A | <i>ZNRF3-<br/>KREMEN1</i> | 2 | rs2294239<br>(0.90)  | A | 0.234  |

**Supplementary Table 11** Assay concordance between Illumina genotyping panels and Kaspar allele specific PCR.

|                           |        | Discovery cases | Discovery and UK replication controls | UK and Irish cases | Dutch cases |
|---------------------------|--------|-----------------|---------------------------------------|--------------------|-------------|
|                           |        | Illumina 670    | Illumina 1.2                          | ImmunoChip         | ImmunoChip  |
| Concordance (sample size) |        |                 |                                       |                    |             |
| rs9257809                 | Kaspar | 1 (166)         | 0.99 (463)                            | 1 (91)             | 1 (39)      |
| rs9936833                 |        | 1 (166)         | 1 (463)                               | 0.99 (91)          | 1 (39)      |

## Supplementary Note

**DNA sample preparation.** Genomic DNA for all discovery cases was shipped to the Wellcome Trust Sanger Institute (WTSI), Cambridge. Where there was sufficient DNA, quality was validated using the Sequenom iPLEX assay designed to genotype 4 gender SNPs and 26 SNPs present on the Illumina Beadchips. DNA concentrations were quantified using a PicoGreen assay (Invitrogen) and an aliquot assayed by agarose gel electrophoresis. A DNA sample was considered to pass quality control if the DNA concentration was greater than or equal to 50 ng/ $\mu$ l, the DNA was not degraded, the sex assignment from the iPLEX assay matched that provided in the patient data manifest and genotypes were obtained for at least two thirds of the SNPs on the iPLEX.

**Discovery Sample Quality Control.** We used a Bayesian clustering approach to infer outlying individuals on the basis of call rate, heterozygosity, African or Asian ancestry (defined by a principal component analysis of the HapMap2 data; see Supplementary Figure 2) and average probe intensity. To obtain a set of putatively unrelated individuals we used a hidden Markov model (HMM) to infer identity by descent along the genome and then iteratively removed individuals to obtain a set with pair-wise identity by descent less than 5%. To guard against sample mishandling we removed samples if their inferred sex was discordant with the recorded sex or if less than 90% of the SNPs typed by Sequenom on entry to the sample handling (see above) agreed with the genome-wide data.

**Principal component analysis (PCA).** We performed Principal Component Analysis (PCA) on a subset of 205,842 post-QC SNPs (none from the MHC), selected so as to minimize the contribution from regions of strong linkage disequilibrium and to ensure that only genome-wide effects are detected. Principal component scores were computed for the combined dataset of post-exclusion case and control samples using the program SHELLFISH. Visual inspection of the SNP loadings suggests that the first principal component reflects genome-wide population structure (data not shown). It also significantly correlated with case-control status and was therefore included as covariate in association analysis.

### **PCA of BEACON samples.**

We performed Principal Component Analysis (PCA) as a two-step process using the SNPRelate software (<http://cran.r-project.org/web/packages/SNPRelate/index.html>). First, we used PCA to define a homogeneous set of European ancestry samples. We did this by running PCA on a set of

6,481 unrelated (except for six two-person families) subjects each of which was either an esophageal cancer case, a Barrett's esophagus case, or a control. A majority of these subjects (~97%) self-identified their race as "White" and a scatterplot of all subjects along the axes of the first two eigenvectors showed the majority of samples formed a tight cluster (data not shown). Therefore, we computed the medians and standard deviations (SD) of the first two eigenvectors and defined any sample that fell within a one SD rectangle of both eigenvector medians to be of homogeneous European ancestry (n=6,302). BE cases and all controls within the PCA defined European ancestry set were used in the replication analysis of rs9936833 and rs9257809.

Next, we performed PCA on these 6,302 subjects. For this analysis we used 66,554 non-monomorphic, autosomal SNPs that passed initial quality control, had missing call rate < 5%, minor allele frequency > 5%, and did not have an LD value > 0.2 between any two SNPs in a sliding window of 500K bases. We included the first four eigenvectors from this analysis as covariates in the association test model since they were significantly correlated with case-control status (of Barrett's esophagus vs. control) and a scree plot showed that the variance accounted for by each eigenvector flattened out after these four eigenvectors (data not shown). To check that only genome-wide variation was detected we computed the absolute value of the correlation coefficient of each of the four eigenvectors against the genotypes for each SNP and did not observe any localized regions of high correlations that would suggest an eigenvector had detected only local variation (data not shown). The lambda using these four eigenvectors was 1.037.

**Imputation.** SNPs were imputed using IMPUTE2 and the 1000 Genomes June 2010 release CEU reference population. Pre-QC there were 516123 SNPs on chromosome 6 and 235844 SNPs on chromosome 16. SNPs with info scores <0.5 were removed from the data, and following QC, 438040 SNPs remained on chr 6 (403914 imputed, 34126 genotyped) and 185980 SNPs remained on chr 16 (170206 imputed, 15774 genotyped).

**HLA imputation.** HLA\*IMP was used to impute classical HLA alleles using SNP genotype data for the discovery phase samples. The "MS\_NBS" set<sup>6</sup> of SNPs was selected to inform the imputation. This SNP set had been selected by the HLA\*IMP team for use in WTCCC2 studies. Best guess alleles imputed with a probability score greater than 0.7 were analysed. 145 different alleles imputed in all three datasets were investigated in the discovery, and alleles with the most significant associations were then imputed in the replication data. The "IMMUNOCHIP" set of SNPs, selected by the HLA\*IMP team was used to inform the replication phase HLA imputation.

**Testing for interactions.** To look for interactions between associated loci, we compared two logistic regression models. In the first (null) model, a separate parameter for each SNP specified the multiplicative increase in the odds of disease with each additional copy of the risk allele for that SNP. We compared this, using a likelihood ratio test, to a model for interaction in which there is a third parameter which modifies the effect associated with carrying risk alleles at both SNPs. There are many different ways to model both the marginal effects at each SNP and their joint effect<sup>7</sup>, and so there are many approaches to search for interactions. The procedure we adopted is perhaps the simplest (multiplicative model marginally at each SNP and a single additional parameter for multiplicative interactions) Similar analyses, using a binary indicator for male individuals, were used to test for interactions between sex and SNPs

**Meta-analysis.** A fixed effect meta-analysis was used to combine the evidence of association across the discovery and replication data sets. To do so, we first fit logistic regression models to each of the data sets as described in Methods, and then averaged the estimated effect size parameter across the data sets, weighting by precision of the estimates. Two-sided P-values were calculated assuming the combined data z-score to be normally distributed.

## **Consortia Membership**

### **Membership of The Esophageal Adenocarcinoma GenEtics Consortium (EAGLE)**

Janusz Jankowski<sup>1,2,3</sup>, Hugh Barr (Chair)<sup>4</sup>, Rebecca Harrison (Deputy Chair)<sup>5</sup> Laura Gay<sup>3</sup>, Francesco Lescai<sup>6</sup>, Manoj Nanji<sup>3</sup>, Anouk van de Winkel<sup>7</sup>, Peter Sasieni<sup>8</sup>, Nigel Trudgill<sup>9</sup>, Maikel Peppelenbosch<sup>7</sup>, Luc van der Laan<sup>10</sup> Ernst Kuipers<sup>7</sup>, Joost Drenth<sup>11</sup>, Wilbert Peters<sup>11</sup>, John Reynolds<sup>12</sup>, Dermot Kelleher<sup>13</sup>, Ross McManus<sup>13</sup>, Heike Grabsch<sup>14</sup>, Hans Prenen<sup>15</sup>, Séverine Vermeire<sup>15</sup>, Raf Bisschops<sup>16</sup>, Sheila Krishnadath<sup>17</sup>, Peter Siersema<sup>18</sup>, Jantine van Baal<sup>18</sup>, Mark Middleton<sup>19</sup>, Russell Petty<sup>20</sup>, Richard Gillies<sup>19</sup>, Nicola Burch<sup>21</sup>, Pradeep Bhandari<sup>22</sup>, Stuart Paterson<sup>23</sup>, Catheryn Edwards<sup>24</sup>, Ian Penman<sup>25</sup>, Kishor Vaidya<sup>26</sup>, Yeng Ang<sup>27</sup>, Iain Murray<sup>28</sup>, Ashref Tawil<sup>29</sup>, Danielle Morris<sup>30</sup>, Chuka Nwokolo<sup>31</sup>, Peter Isaacs<sup>32</sup>, Colin Rodgers<sup>33</sup>, Krish Rangunath<sup>34</sup>, Christopher MacDonald<sup>35</sup>, Chris Haigh<sup>36</sup>, David Monk<sup>37</sup>, Gareth Davies<sup>38</sup>, Saj Wajed<sup>39</sup>, David Johnston<sup>40</sup>, Michael Gibbons<sup>41</sup>, Sue Cullen<sup>42</sup>, Nick Church<sup>43</sup>, Ruth Langley<sup>44</sup>, Michael Griffin<sup>45</sup>, Derek Alderson<sup>46</sup>, Mark Anderson<sup>47</sup>, Claire Brooks<sup>48</sup> Paul Atherfold<sup>49,50</sup>, Anna Nicholson<sup>3</sup>, Nichola Gellatly<sup>3</sup>, Deborah Glancy<sup>21</sup>, Sheldon Cooper<sup>9</sup>, David Cunningham<sup>51</sup>, Tore

Lind<sup>52</sup>, Julie Hapeshi<sup>53</sup>, Sharon Love<sup>54</sup>, Stephen Attwood<sup>55</sup>, Peter Watson<sup>56</sup>, Scott Sanders<sup>57</sup>, Paul Moayyedi<sup>58</sup>, John deCaestecker<sup>59</sup>, Elia Stupka<sup>6</sup>, Ian Tomlinson<sup>60,61</sup>.

AspECT Data and safety monitoring committee

David Ferry<sup>62</sup>, Barrie Rathbone<sup>21</sup>, Julia Brown<sup>63</sup>

Chair of AspECT and ChOPIN ethics committees

Art Tucker<sup>64</sup>

<sup>1</sup> Department of Oncology, Old Road Campus, University of Oxford, Oxford OX3 7DQ, UK; <sup>2</sup> Digestive Diseases Centre, Leicester Royal Infirmary, Leicester LE7 7HH, UK; <sup>3</sup> Centre for Digestive Diseases, Blizard Institute, Queen Mary University of London, London E1 2AT, UK; <sup>4</sup> Department of Upper GI Surgery, Gloucestershire Royal Hospital, Gloucester G11 3NN, UK; <sup>5</sup> Department of Pathology, Leicester Royal Infirmary, Leicester LE1 5WW, UK; <sup>6</sup> UCL Cancer Institute, University College London, London WC1E 6BT, UK; <sup>7</sup> Department of Gastroenterology and Hepatology, Erasmus MC - University Medical Centre Rotterdam, Rotterdam, The Netherlands; <sup>8</sup> Centre for Cancer Prevention, Wolfson Institute of Preventive Medicine, Barts and The London, London EC1M 6BQ, UK; <sup>9</sup> Department of Gastroenterology, Sandwell General Hospital, Lyndon, West Bromwich B71 4HJ, UK; <sup>10</sup> Department of Surgery, Erasmus MC - University Medical Centre Rotterdam, Rotterdam, The Netherlands; <sup>11</sup> Department of Gastroenterology and Hepatology, Radboud University Nijmegen Medical Centre, Nijmegen, The Netherlands; <sup>12</sup> Department of Surgery, Trinity College Dublin, St James's Hospital, Dublin 8, Ireland; <sup>13</sup> Department of Clinical Medicine and Institute of Molecular Medicine, St James's Hospital, Trinity College Dublin, Dublin 8, Ireland; <sup>14</sup> Pathology and Tumour Biology, Leeds Institute of Molecular Medicine, University of Leeds, St James's University Hospital, Leeds LS9 7TF, UK; <sup>15</sup> Department of Digestive Oncology, University Hospital Gasthuisberg, Leuven, Belgium; <sup>16</sup> Department of Gastroenterology, University Hospital Gasthuisberg, Leuven, Belgium; <sup>17</sup> Department of Gastroenterology and Hepatology, Academic Medical Center, Amsterdam, The Netherlands; <sup>18</sup> Department of Gastroenterology and Hepatology, University Medical Center Utrecht, Utrecht, The Netherlands; <sup>19</sup> University of Oxford Department of Medical Oncology, Churchill Hospital Oxford OX3 7LJ, UK; <sup>20</sup> Institute of Medical Sciences, School of Medicine and Dentistry, University of Aberdeen, Foresterhill, Aberdeen AB25 2ZD, UK; <sup>21</sup> Digestive Disease Academic Centre, Leicester Royal Infirmary, Leicester LE1 5WW, UK; <sup>22</sup> Gastroenterology, Queen Alexandra Hospital, Portsmouth PO6 3LY, UK; <sup>23</sup> Forth Valley Royal

Hospital, Larbert, Scotland FK5 4WR, UK; <sup>24</sup> Department of Gastroenterology, Torbay Hospital Torquay TQ2 7AA, UK; <sup>25</sup> GI Unit, Royal Infirmary of Edinburgh, Edinburgh EH16 4SA, UK; <sup>26</sup> Victoria Hospital, Kirkcaldy, Fife KY2 5AH, UK; <sup>27</sup> Gastroenterology, Royal Albert Edward Infirmary NHS Trust, Wigan WN1 2NN, UK; <sup>28</sup> Department of Gastroenterology, Royal Cornwall Hospital, Truro, Cornwall TR1 3LJ, UK; <sup>29</sup> Gastroenterology, North Devon District Hospital, Barnstaple, North Devon EX31 4JB, UK; <sup>30</sup> Department of Gastroenterology, QEII East & North Herts NHS Trust Welwyn Garden City, Queen Elizabeth Hospital, Welwyn Garden City AL7 4HQ, UK; <sup>31</sup> Department of Gastroenterology, University Hospital of Coventry, Coventry CV2 2DX, UK; <sup>32</sup> Gastroenterology, Blackpool Victoria Hospital, Blackpool FY3 8NR, UK; <sup>33</sup> Gastroenterology, Antrim & Whiteabbey United Hospitals, Antrim BT41 2RL, NI; <sup>34</sup> Wolfson Digestive Diseases Centre, Queens Medical Centre, Nottingham NG7 2UH, UK; <sup>35</sup> Gastroenterology, Cumberland Infirmary Carlisle, Cumbria CA2 7HY, UK; <sup>36</sup> Department of Gastroenterology, Wansbeck General Hospital, Ashington, Northumberland NE63 9JJ, UK; <sup>37</sup> General Surgery, Countess of Chester Hospital, Chester CH2 1UL, UK; <sup>38</sup> Gastroenterology, Harrogate District Hospital, Harrogate HG2 7SX, UK; <sup>39</sup> Department of Thoracic and Upper Gastrointestinal Surgery, Royal Devon and Exeter NHS Foundation Trust, Exeter EX2 5DW, UK; <sup>40</sup> Gastroenterology, Ninewells Hospital, Dundee DD1 9SY, UK; <sup>41</sup> Gastroenterology, Craigavon Area Hospital, Craigavon BT63 5QQ, NI; <sup>42</sup> Wycombe Hospital, High Wycombe HP11 2TT, UK; <sup>43</sup> Edinburgh Royal Infirmary, 41 Lauriston Pl, Edinburgh EH3 9HB, UK; <sup>44</sup> MRC Clinical Trials Unit, Aviation House, 125 Kingsway, London WC2B 6NH, UK; <sup>45</sup> Northern Oesophago Gastric Unit, Royal Victoria Infirmary, Queen Victoria Road Newcastle upon Tyne NE1 4LP, UK; <sup>46</sup> University of Birmingham College of Medical and Dental Sciences School of Cancer Sciences, Academic Department of Surgery Room 29, 4th Floor, (Old) Queen Elizabeth Hospital Edgbaston, Birmingham B15 2TH, UK; <sup>47</sup> GI Unit, City Hospital Birmingham B18 7QH, UK; <sup>48</sup> Oncology Clinical Trials Office, Department of Oncology, Old Road Campus Research Building, University of Oxford Old Road Campus, Roosevelt Drive, Oxford OX3 7DQ, UK; <sup>49</sup> Department of Clinical Pharmacology, University of Oxford OX3 7DQ, UK; <sup>50</sup> UCB, 216 Bath Road, Slough SL1 4EN, UK; <sup>51</sup> Medical Oncology, Royal Marsden Hospital, Fulham Rd, London SW3 6JJ, UK; <sup>52</sup> Research and Development, AstraZeneca, Lund, Sweden; <sup>53</sup> Gloucestershire Research & Development Support Unit, Gloucestershire Royal Hospital, Great Western Road, Gloucester GL1 3NN, UK; <sup>54</sup> Centre for Statistics in Medicine (CSM) and Oxford Clinical Trials Research Unit (OCTRU), Linton Road, Oxford OX2 6UD, UK; <sup>55</sup> General Surgery, North Tyneside General Hospital North Shields, Tyne and Wear NE29 8NH, UK; <sup>56</sup> Department of Medicine, Institute of Clinical Science, Royal Victoria Hospital Belfast, Belfast BT12 6BA, NI; <sup>57</sup> Department of



Cellular Pathology, Warwick Hospital, Warwick CV34 5BW, UK; <sup>58</sup> Division of Gastroenterology, Department of Medicine, McMaster University Medical Centre, 1200 Main Street West, HSC 4W8E, Hamilton, ON, L8N 3Z5, Canada; <sup>59</sup> Department of Gastroenterology, Leicester General Hospital, Leicester LE5 4PW, UK; <sup>60</sup> Wellcome Trust Centre for Human Genetics, University of Oxford, Roosevelt Drive, Oxford OX3 7BN, UK; <sup>61</sup> Oxford NIHR Comprehensive Biomedical Research Centre, UK; <sup>62</sup> Department of Oncology, New Cross Hospital, Royal Wolverhampton Hospitals NHS Trust, Wolverhampton WV10 0QP, UK; <sup>63</sup> Clinical Trial Research Unit, Leeds Institute of Molecular Medicine, Springfield Mount, Leeds LS2 9NG, UK; <sup>64</sup> Centre for Clinical Pharmacology, William Harvey Research Institute, Queen Mary University of London, London EC1M 6BQ, UK

## **Membership of Wellcome Trust Case Control Consortium 2**

### Management Committee

Peter Donnelly (Chair)<sup>1,2</sup>, Ines Barroso (Deputy Chair)<sup>3</sup>, Jenefer M Blackwell<sup>4,5</sup>, Elvira Bramon<sup>6</sup>, Matthew A Brown<sup>7</sup>, Juan P Casas<sup>8</sup>, Aiden Corvin<sup>9</sup>, Panos Deloukas<sup>3</sup>, Audrey Duncanson<sup>10</sup>, Janusz Jankowski<sup>11</sup>, Hugh S Markus<sup>12</sup>, Christopher G Mathew<sup>13</sup>, Colin NA Palmer<sup>14</sup>, Robert Plomin<sup>15</sup>, Anna Rautanen<sup>1</sup>, Stephen J Sawcer<sup>16</sup>, Richard C Trembath<sup>13</sup>, Ananth C Viswanathan<sup>17</sup>, Nicholas W Wood<sup>18</sup>

### Data and Analysis Group

Chris C A Spencer<sup>1</sup>, Gavin Band<sup>1</sup>, Céline Bellenguez<sup>1</sup>, Colin Freeman<sup>1</sup>, Garrett Hellenthal<sup>1</sup>, Eleni Giannoulatou<sup>1</sup>, Matti Pirinen<sup>1</sup>, Richard Pearson<sup>1</sup>, Amy Strange<sup>1</sup>, Zhan Su<sup>1</sup>, Damjan Vukcevic<sup>1</sup>, Peter Donnelly<sup>1,2</sup>

### DNA, Genotyping, Data QC and Informatics Group

Cordelia Langford<sup>3</sup>, Sarah E Hunt<sup>3</sup>, Sarah Edkins<sup>3</sup>, Rhian Gwilliam<sup>3</sup>, Hannah Blackburn<sup>3</sup>, Suzannah J Bumpstead<sup>3</sup>, Serge Dronov<sup>3</sup>, Matthew Gillman<sup>3</sup>, Emma Gray<sup>3</sup>, Naomi Hammond<sup>3</sup>, Alagurevathi Jayakumar<sup>3</sup>, Owen T McCann<sup>3</sup>, Jennifer Liddle<sup>3</sup>, Simon C Potter<sup>3</sup>, Radhi Ravindrarajah<sup>3</sup>, Michelle Ricketts<sup>3</sup>, Matthew Waller<sup>3</sup>, Paul Weston<sup>3</sup>, Sara Widaa<sup>3</sup>, Pamela Whittaker<sup>3</sup>, Ines Barroso<sup>3</sup>, Panos Deloukas<sup>3</sup>.

### Publications Committee

Christopher G Mathew (Chair)<sup>13</sup>, Jenefer M Blackwell<sup>4,5</sup>, Matthew A Brown<sup>7</sup>, Aiden Corvin<sup>9</sup>,  
Chris C A Spencer<sup>1</sup>

<sup>1</sup> Wellcome Trust Centre for Human Genetics, Roosevelt Drive, Oxford OX3 7BN, UK; <sup>2</sup> Dept Statistics, University of Oxford, Oxford OX1 3TG, UK; <sup>3</sup> Wellcome Trust Sanger Institute, Wellcome Trust Genome Campus, Hinxton, Cambridge CB10 1SA, UK; <sup>4</sup> Telethon Institute for Child Health Research, Centre for Child Health Research, University of Western Australia, 100 Roberts Road, Subiaco, Western Australia 6008; <sup>5</sup> Cambridge Institute for Medical Research, University of Cambridge School of Clinical Medicine, Cambridge CB2 0XY, UK; <sup>6</sup> Department of Psychosis Studies, NIHR Biomedical Research Centre for Mental Health at the Institute of Psychiatry, King's College London and The South London and Maudsley NHS Foundation Trust, Denmark Hill, London SE5 8AF, UK; <sup>7</sup> University of Queensland Diamantina Institute, Princess Alexandra Hospital, University of Queensland, Brisbane, Queensland, Australia; <sup>8</sup> Dept Epidemiology and Population Health, London School of Hygiene and Tropical Medicine, London WC1E 7HT and Dept Epidemiology and Public Health, University College London WC1E 6BT, UK; <sup>9</sup> Neuropsychiatric Genetics Research Group, Institute of Molecular Medicine, Trinity College Dublin, Dublin 2, Ireland; <sup>10</sup> Molecular and Physiological Sciences, The Wellcome Trust, London NW1 2BE; <sup>11</sup> Centre for Digestive Diseases, Blizard Institute, Queen Mary University of London, London E1 2AT, UK and Digestive Diseases Centre, Leicester Royal Infirmary, Leicester LE7 7HH, UK and Department of Clinical Pharmacology, Old Road Campus, University of Oxford, Oxford OX3 7DQ, UK; <sup>12</sup> Clinical Neurosciences, St George's University of London, London SW17 0RE; <sup>13</sup> King's College London Dept Medical and Molecular Genetics, King's Health Partners, Guy's Hospital, London SE1 9RT, UK; <sup>14</sup> Biomedical Research Centre, Ninewells Hospital and Medical School, Dundee DD1 9SY, UK; <sup>15</sup> King's College London Social, Genetic and Developmental Psychiatry Centre, Institute of Psychiatry, Denmark Hill, London SE5 8AF, UK; <sup>16</sup> University of Cambridge Dept Clinical Neurosciences, Addenbrooke's Hospital, Cambridge CB2 0QQ, UK; <sup>17</sup> NIHR Biomedical Research Centre for Ophthalmology, Moorfields Eye Hospital NHS Foundation Trust and UCL Institute of Ophthalmology, London EC1V 2PD, UK; <sup>18</sup> Dept Molecular Neuroscience, Institute of Neurology, Queen Square, London WC1N 3BG, UK; <sup>19</sup> Oxford Centre for Diabetes, Endocrinology and Metabolism (ICDEM), Churchill Hospital, Oxford OX3 7LJ, UK.

**Members of the Mayo Clinic Esophageal Adenocarcinoma and Barrett's Esophagus  
Registry Consortium**

Sami R. Achem, M.D.<sup>1</sup>, David A. Ahlquist, M.D.<sup>2</sup>, Steven R. Alberts, M.D.<sup>2</sup>, Jeffrey A. Alexander, M.D.<sup>2</sup>, Mark S. Allen, M.D.<sup>2</sup>, Amindra S. Arora, MBBChir<sup>2</sup>, Jonathan B. Ashman, M.D., Ph.D.<sup>3</sup>, Pamela J. Atherton<sup>2</sup>, Lisa A. Boardman, M.D.<sup>2</sup>, Ernest P. Bouras, M.D.<sup>1</sup>, Vicki A. Bryhn<sup>2</sup>, Patrick A. Burch, M.D.<sup>2</sup>, George E. Burdick, M.D.<sup>2</sup>, Navtej S. Buttar, M.D.<sup>2</sup>, John K. Camoriano, M.D.<sup>3</sup>, John R. Cangemi, M.D.<sup>1</sup>, Stephen D. Cassivi, M.D.<sup>2</sup>, Frances K. Cayer<sup>1</sup>, Amy C. Clayton, M.D.<sup>2</sup>, Michael D. Crowell, M.D., Ph.D.<sup>3</sup>, Julie M. Cunningham, Ph.D.<sup>2</sup>, Mariza de Andrade, Ph.D.<sup>2</sup>, Piet de Groen, M.D.<sup>2</sup>, Giovanni De Petris, M.D.<sup>3</sup>, Claude Deschamps, M.D.<sup>2</sup>, Kenneth R. DeVault, M.D.<sup>1</sup>, Robert B. Diasio, M.D.<sup>2</sup>, John K. DiBaise, M.D.<sup>3</sup>, Eric S. Edell, M.D.<sup>2</sup>, Sharon Elcombe<sup>2</sup>, Charles Erlichman, M.D.<sup>2</sup>, Douglas O. Faigel, M.D.<sup>3</sup>, Tom R. Fitch, M.D.<sup>3</sup>, David E. Fleischer, M.D.<sup>3</sup>, Jean C. Fox, M.D.<sup>2</sup>, Amy E. Foxx-Orenstein, D.O.<sup>2</sup>, Dawn Francis, M.D.<sup>2</sup>, Mary B. Fredericksen<sup>2</sup>, Evanthia Galanis, M.D.<sup>2</sup>, Debra M. Geno<sup>2</sup>, Axel Grothey, M.D.<sup>2</sup>, Michael G. Haddock, M.D.<sup>2</sup>, Kevin C. Halling, M.D., Ph.D.<sup>2</sup>, Denise M. Harnois, D.O.<sup>1</sup>, Tracy W. Hilton<sup>1</sup>, Timothy Hobday, M.D.<sup>2</sup>, Lesley A. Houghton, Ph.D.<sup>1</sup>, Prasad A. Iyer, M.D.<sup>2</sup>, Dawn E. Jaroszewski, M.D.<sup>3</sup>, Aminah Jatoi, M.D.<sup>2</sup>, Robert B. Jenkins, M.D., Ph.D.<sup>2</sup>, Elizabeth A. Johnson, M.D.<sup>1</sup>, Rajni Katipamula, M.D.<sup>2</sup>, David A. Katzka, M.D.<sup>2</sup>, Sharon F. Kaufman<sup>2</sup>, Andrew P. Keaveny, M.D.<sup>1</sup>, Daniel A. Keller<sup>2</sup>, George P. Kim, M.D.<sup>1</sup>, Benjamin R. Kipp, Ph.D.<sup>2</sup>, Dora M. Lam-Himlin, M.D.<sup>2</sup>, Stephen M. Lange, M.D.<sup>1</sup>, Louis Lanza, M.D.<sup>3</sup>, Shauna N. Legrand<sup>1</sup>, Paul J. Limburg, M.D.<sup>2</sup>, Wilma L. Lingle, Ph.D.<sup>2</sup>, Wanguo Liu, Ph.D.<sup>2</sup>, G. Richard Locke, III, M.D.<sup>2</sup>, David S. Loeb, M.D.<sup>1</sup>, Lori S. Lutzke<sup>2</sup>, James A. Martenson, Jr., M.D.<sup>2</sup>, Robert R. McWilliams, M.D.<sup>2</sup>, Robert C. Miller, M.D.<sup>2</sup>, Joseph A. Murray, M.D.<sup>2</sup>, Cuong C. Nguyen, M.D.<sup>3</sup>, Francis C. Nichols, III, M.D.<sup>2</sup>, John A. Odell, M.D.<sup>1</sup>, Rahul Pannala, M.D.<sup>3</sup>, Harshita R. Paripati, M.D.<sup>2</sup>, Alexander S. Parker, Ph.D.<sup>1</sup>, Shabana F. Pasha, M.D.<sup>2</sup>, Bret T. Petersen, M.D.<sup>2</sup>, Gloria M. Petersen, Ph.D.<sup>2</sup>, Michael F. Picco, M.D.<sup>1</sup>, Henry C. Pitot, M.D.<sup>2</sup>, J. Fernando Quevedo, M.D.<sup>2</sup>, Massimo Raimondo, M.D.<sup>1</sup>, Elizabeth Rajan, M.D.<sup>2</sup>, Francisco (Pancho) C. Ramirez, M.D.<sup>2</sup>, Yvonne Romero, M.D.<sup>2</sup>, Renee M. Root<sup>2</sup>, Helen J. Ross, M.D.<sup>3</sup>, Joseph Rubin, M.D.<sup>2</sup>, Schuyler O. Sanderson, M.D.<sup>2</sup>, Daniel J. Sargent, Ph.D.<sup>2</sup>, Daniel J. Schaid, Ph.D.<sup>2</sup>, K. Robert Shen, M.D.<sup>2</sup>, Qian Shi, Ph.D.<sup>2</sup>, Frank A. Sinicrope, M.D.<sup>2</sup>, Jeff A. Sloan, Ph.D.<sup>2</sup>, Dan C. Smith, M.D.<sup>1</sup>, David I. Smith, Ph.D.<sup>2</sup>, Thomas C. Smyrk, M.D.<sup>2</sup>, Mark E. Stark, M.D.<sup>1</sup>, Nicholas Talley, M.D., Ph.D.<sup>2</sup>, Stephen N. Thibodeau, Ph.D.<sup>2</sup>, Michael D. Van Norstrand, M.D., Ph.D.<sup>2</sup>, Michael B. Wallace, M.D.<sup>1</sup>, Kenneth K. Wang, M.D.<sup>2</sup>, Richard M. Weinshilboum, M.D.<sup>2</sup>, Dennis Wigle, M.D., Ph.D.<sup>2</sup>, Herbert C. Wolfsen, M.D.<sup>1</sup>, Louis M. Wong Kee Song, M.D.<sup>2</sup>, Timothy A. Woodward, M.D.<sup>1</sup>, Tsung-The Wu, M.D., Ph.D.<sup>2</sup>, Harry H. Yoon, M.D.<sup>2</sup>, Alan R. Zinsmeister, Ph.D.<sup>2</sup>

### Supplementary References

1. Speliotes, E.K. et al. Association analyses of 249,796 individuals reveal 18 new loci associated with body mass index. *Nat Genet* **42**, 937-48 (2010).
2. Heid, I.M. et al. Meta-analysis of the INSIG2 association with obesity including 74,345 individuals: does heterogeneity of estimates relate to study design? *PLoS Genet* **5**, e1000694 (2009).
3. Lindgren, C.M. et al. Genome-wide association scan meta-analysis identifies three Loci influencing adiposity and fat distribution. *PLoS Genet* **5**, e1000508 (2009).
4. Heard-Costa, N.L. et al. NRXN3 is a novel locus for waist circumference: a genome-wide association study from the CHARGE Consortium. *PLoS Genet* **5**, e1000539 (2009).
5. Loos, R.J. et al. Common variants near MC4R are associated with fat mass, weight and risk of obesity. *Nat Genet* **40**, 768-75 (2008).
6. Dillthey, A.T., Moutsianas, L., Leslie, S. & McVean, G. HLA\*IMP--an integrated framework for imputing classical HLA alleles from SNP genotypes. *Bioinformatics* **27**, 968-72 (2011).
7. Marchini, J., Donnelly, P. & Cardon, L.R. Genome-wide strategies for detecting multiple loci that influence complex diseases. *Nat Genet* **37**, 413-7 (2005).
